# Measuring stimulus-evoked neurophysiological differentiation in distinct populations of neurons in mouse visual cortex

William G. P. Mayner<sup>1,2,\*</sup>, William Marshall<sup>2,3</sup>, Yazan N. Billeh<sup>4</sup>, Saurabh R. Gandhi<sup>4</sup>, Shiella Caldejon<sup>4</sup>, Andrew Cho<sup>4</sup>, Fiona Griffin<sup>4</sup>, Nicole Hancock<sup>4</sup>, Sophie Lambert<sup>4</sup>, Eric Lee<sup>4</sup>, Jennifer Luviano<sup>4</sup>, Kyla Mace<sup>4</sup>, Chelsea Nayan<sup>4</sup>, Thuyanh Nguyen<sup>4</sup>, Kat North<sup>4</sup>, Sam Seid<sup>4</sup>, Ali Williford<sup>4</sup>, Chiara Cirelli<sup>2</sup>, Peter Groblewski<sup>4</sup>, Jerome Lecoq<sup>4</sup>, Giulio Tononi<sup>2</sup>, Christof Koch<sup>4</sup>, Anton Arkhipov<sup>4,\*</sup>

<sup>1</sup> Neuroscience Training Program, University of Wisconsin–Madison, Madison, WI, United States of America

<sup>2</sup> Department of Psychiatry, University of Wisconsin–Madison, Madison, WI, United States of America

<sup>3</sup> Department of Mathematics and Statistics, Brock University, St. Catharines, ON, Canada

<sup>4</sup> Allen Institute, Seattle, WA, United States of America

\* Correspondence: [mayner@wisc.edu](mailto:mayner@wisc.edu) (W.G.P.M.), [antona@alleninstitute.org](mailto:antona@alleninstitute.org) (A.A.)

## Abstract

1           Despite significant progress in understanding neural coding, it  
2           remains unclear how the coordinated activity of large populations  
3           of neurons relates to what an observer actually perceives. Since  
4           neurophysiological differences must underlie differences among  
5           percepts, *differentiation analysis*—quantifying distinct patterns of  
6           neurophysiological activity—is an “inside out” approach that  
7           addresses this question. We used two-photon calcium imaging in  
8           mice to systematically survey stimulus-evoked neurophysiological  
9           differentiation in excitatory populations across 3 cortical layers  
10          (L2/3, L4, and L5) in each of 5 visual cortical areas (primary,  
11          lateral, anterolateral, posteromedial, and anteromedial) in  
12          response to naturalistic and phase-scrambled movie stimuli. We  
13          find that unscrambled stimuli evoke greater neurophysiological  
14          differentiation than scrambled stimuli specifically in L2/3 of the  
15          anterolateral and anteromedial areas, and that this effect is  
16          modulated by arousal state and locomotion. Contrariwise,  
17          decoding performance was far above chance and did not vary  
18          substantially across areas and layers. Differentiation also differed  
19          within the unscrambled stimulus set, suggesting that differentiation  
20          analysis may be used to probe the ethological relevance of  
21          individual stimuli.

## 22 1 Introduction

23 The visual system acts on incoming stimuli to extract meaningful features and guide behavior, a  
24 process that transforms physical input into conscious visual percepts. Since the early  
25 experiments of Hubel and Wiesel (1959), neuroscience has yielded considerable insight into the  
26 visual system by analyzing neural response properties to uncover which features cells are tuned  
27 to and how their activity relates to behavior. Modern decoding approaches have revealed  
28 stimulus information present in population responses (Quiroga & Panzeri, 2009). However, that  
29 a given population of neurons represents or encodes stimulus information does not imply that  
30 this information is used to generate conscious percepts in the subject (Brette, 2019).  
31 Consequently, despite the success of these “outside in” methods (Buzsáki, 2019) in  
32 understanding neural coding, it remains unclear how the coordinated activity of large  
33 populations of neurons relates to what the observer actually sees.

34 Is there an objective and quantitative approach to analyzing neural responses that can shed  
35 light on this question? *Differentiation analysis*—measuring the extent to which a population of  
36 neurons expresses a rich and varied repertoire of states—has been proposed as one such  
37 approach (Boly et al., 2015; Mensen et al., 2017, 2018). Differentiation analysis exemplifies  
38 “inside out” methodology (Buzsáki, 2019) in that the spatiotemporal diversity of neural activity  
39 (*neurophysiological differentiation* or ND) is quantified without reference to the stimulus or other  
40 experimental variables imposed *a priori* by the investigator, in contrast to feature tuning or  
41 decoding analyses. Supporting this proposal, recent studies in humans have shown that the ND  
42 evoked by a stimulus is correlated with subjective reports of its “meaningfulness” and the  
43 “number of distinct experiences” it elicits (Mensen et al., 2017, 2018).

44 A visual stimulus can be considered meaningful to the observer if it evokes rich and varied  
45 perceptual experiences (*phenomenological differentiation*). For example, an engaging movie is  
46 meaningful in this sense, as it evokes many distinct percepts with high-level structure;  
47 conversely, flickering ‘TV noise’ essentially evokes a single percept with no high-level structure  
48 to a human observer, even though, at the level of pixels, any two frames of noise are likely to be  
49 more different from each other than a pair of frames from a movie (*stimulus differentiation*).  
50 Since conscious percepts are generated by brain states, ND must underlie phenomenological  
51 differentiation. Thus one can expect to see correlations between ND and subjective perception  
52 of the “richness” or “meaningfulness” of stimuli, as has indeed been shown in human studies  
53 using fMRI and EEG (Boly et al., 2015; Mensen et al., 2017, 2018).

54 Moreover, integrated information theory (IIT) posits a fundamental relationship between ND and  
55 subjective experience itself. This theoretical framework predicts that consciousness requires the  
56 joint presence of integration and differentiation: that is, a system is conscious if it is causally  
57 irreducible to its parts and possesses a rich dynamical repertoire of states (Tononi, 2004;  
58 Oizumi et al., 2014; Tononi et al., 2016). Theoretical work has demonstrated that ND can serve  
59 as a proxy for integrated information in highly recurrent systems where integration can be  
60 assumed, such as the brain (Marshall et al., 2016). Consistent with IIT’s predictions, several  
61 studies have employed differentiation analysis across a range of species and spatiotemporal  
62 scales to show that loss of ND is implicated in loss of consciousness (Casali et al., 2013;  
63 Hudetz et al., 2014; Barttfeld et al., 2015; Wenzel et al., 2019).

64 However, although the applications of differentiation analysis cited above suggest that ND can  
65 provide a readout of stimulus-evoked phenomenological differentiation (Boly et al., 2015;  
66 Mensen et al., 2017, 2018), the low spatial resolution of fMRI and EEG has so far precluded

67 identifying the specific cell populations that underlie this correspondence. Indeed, a  
68 longstanding question of fundamental importance is which populations of neurons contribute  
69 directly to generating conscious percepts (Koch et al., 2016; Tononi et al., 2016; Mashour et al.,  
70 2020). According to the considerations above, differentiation analysis can shed light on this  
71 question, but to do so it must be applied to recorded brain signals from specific populations of  
72 neurons. This requires systematically measuring stimulus-evoked ND with cellular resolution.

73 To address this gap, we leveraged the Allen Institute for Brain Science (AIBS) pipeline for *in*  
74 *vivo* two-photon calcium ( $\text{Ca}^{2+}$ ) imaging (de Vries et al., 2020) to measure stimulus-evoked ND  
75 in the visual cortex of the mouse. The present work represents one of the first projects within the  
76 *OpenScope* initiative, a collaborative model in which the capabilities of the AIBS “brain  
77 observatory” are made available to the wider neuroscientific community. The standardized,  
78 high-throughput OpenScope data acquisition pipeline allowed us to conduct a systematic survey  
79 of ND in excitatory cell populations across 3 cortical layers—layer (L) 2/3, L4, and L5—in each  
80 of 5 visual cortical areas: primary (V1), lateral (L), anterolateral (AL), posteromedial (PM), and  
81 anteromedial (AM), as awake mice were presented with visual stimuli. We used twelve 30 s  
82 movie stimuli chosen to span different levels of putative ethological relevance. The stimuli  
83 included naturalistic video clips of predators, prey, conspecifics, the home cage, movement  
84 through the underbrush of a forest (putatively of high ecological relevance to mice); clips of  
85 roadways, automobiles, and humans (putatively of low ethological relevance); and artificially  
86 generated clips with no ethological relevance. Some of the artificial stimuli were phase-  
87 scrambled versions of the naturalistic stimuli, which enabled us to contrast stimuli containing  
88 high-level structure against meaningless stimuli while controlling for low-order statistics.

89 We hypothesized that unscrambled naturalistic stimuli, which presumably elicit meaningful  
90 visual percepts, would evoke greater ND than their meaningless phase-scrambled counterparts.  
91 Indeed, we find that unscrambled stimuli evoke greater ND than scrambled stimuli specifically in  
92 L2/3 of areas AL & AM (*i.e.*, not in L4 or L5 of any area, nor in any sampled layer of areas V1, L,  
93 and PM). This effect is modulated by arousal and behavioral state and is robust to different  
94 methods of measuring ND. We contrast this layer- and area-specific finding with a decoding  
95 analysis that shows that information about the stimulus category, whether meaningful or  
96 meaningless, is present in most cell populations. This highlights a key difference between the  
97 methodological approaches: ND is more plausibly correlated with stimulus meaningfulness than  
98 the information measured by decoding, since the latter may not be functionally relevant (Brette,  
99 2019). Furthermore, we find differences in evoked ND among the unscrambled stimuli that  
100 suggest that differentiation analysis can probe meaningfulness of individual stimuli.

## 101 2 Results

102 Using the AIBS OpenScope two-photon  $\text{Ca}^{2+}$  imaging pipeline (de Vries et al., 2020; **Figure**  
103 **1A–D**), we recorded from the left visual cortex of mice while they passively viewed stimuli  
104 presented to the contralateral eye. We used the transgenic lines *Cux2*, *Rorb*, and *Rbp4* (3 mice  
105 each) in which GCaMP6f is expressed in excitatory neurons predominantly in L2/3, L4, and L5,  
106 respectively. Visual cortical areas were delineated via intrinsic signal imaging (ISI; **Figure 1B**).  
107 Data were collected from 5 areas (V1, L, AL, PM, and AM; **Figure 1E**) across 45 experimental  
108 sessions (15 sessions per Cre line; 5 sessions per area; ~5 sessions per mouse). Mice were  
109 head-fixed and free to move on a rotating disc. Pupil diameter and running velocity were  
110 recorded. During each 70-minute session, twelve 30 s movie stimuli were presented in a  
111 randomized block design with 10 repetitions, with 4 s of mean-luminance grey shown between  
112 stimulus presentations (**Figure 1F,G**; see **Stimuli**). Stimuli were presented in greyscale but

113 were not otherwise modified (in particular, it should be noted that spatial frequencies beyond the  
114 mouse acuity limit will appear blurred to the mice). Representative  $\Delta F/F_0$  traces and behavioral  
115 data are shown in **Figure 1H**. One imaging session in L5 of AL was excluded from our analyses  
116 because of technical problems with the two-photon recording.

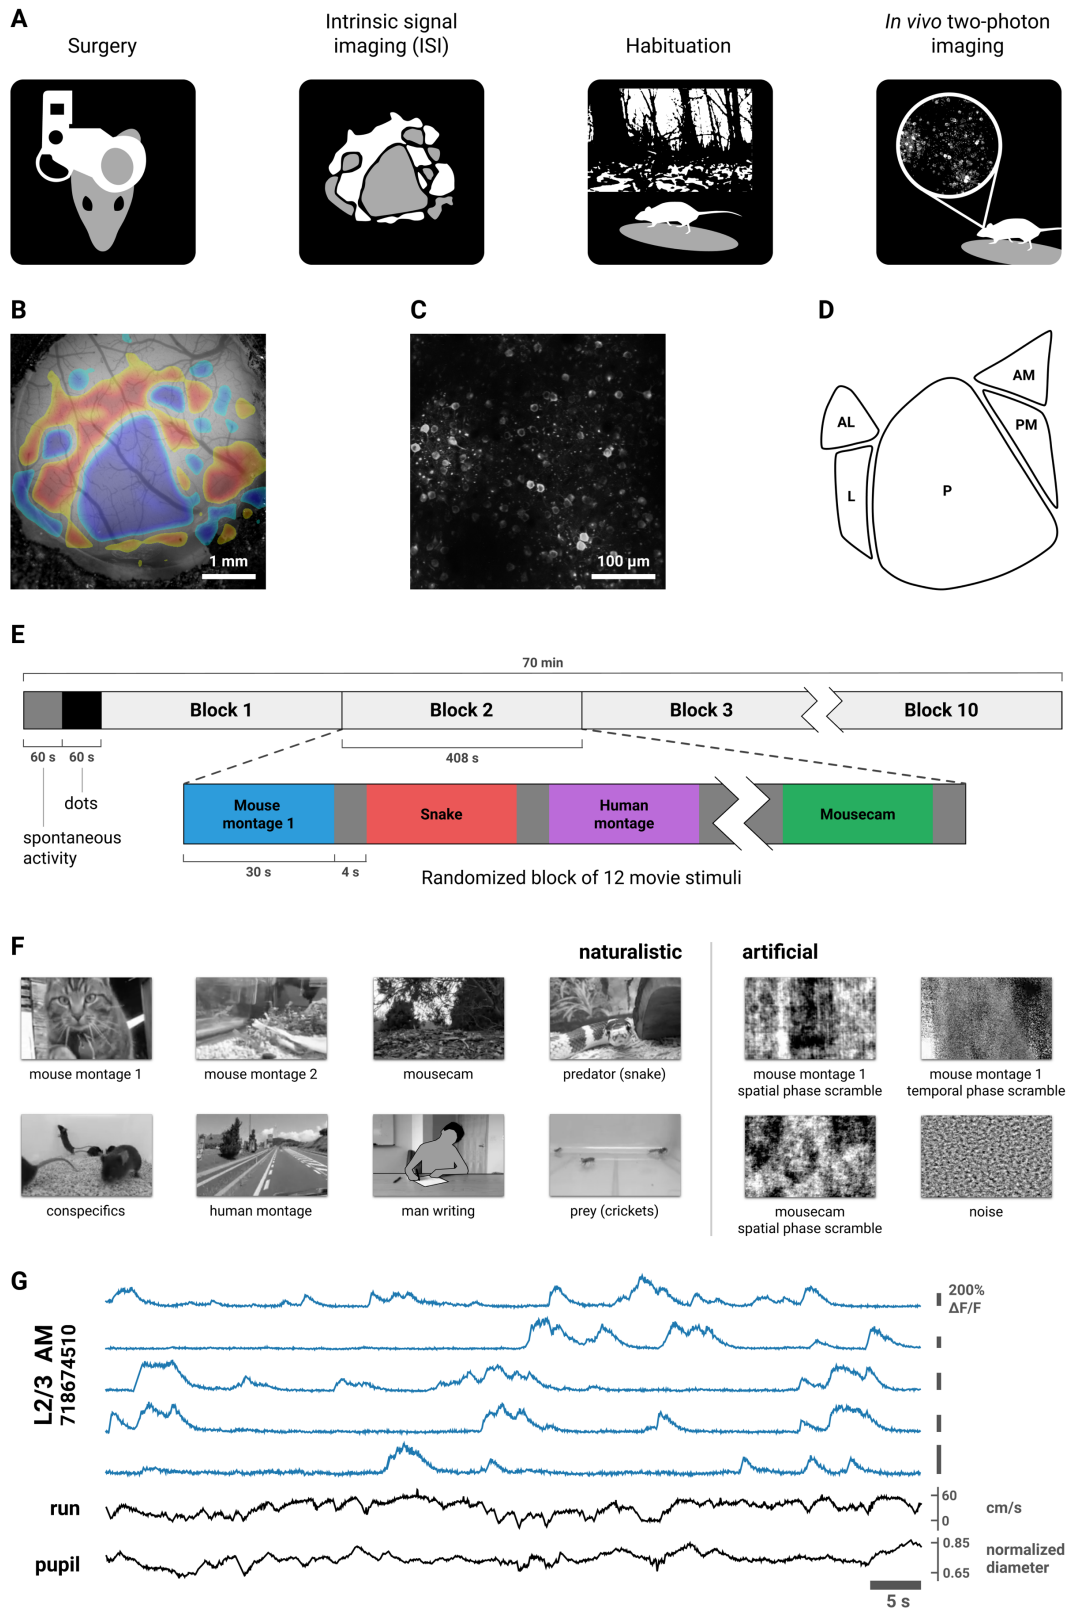

117  
118  
119  
120

Figure 1. **Experimental design.** (A) Data were acquired using the AIBS' standardized two-photon calcium imaging pipeline (de Vries et al., 2020; Groblewski et al., 2020; see **Methods**). Briefly, a custom headframe was implanted; intrinsic signal imaging (ISI) was performed to delineate

121 retinotopically mapped visual areas; the mouse was habituated to the passive viewing paradigm  
 122 over the course of ~2 weeks; and two-photon calcium imaging was performed in the left visual  
 123 cortex while animals viewed stimuli presented to the contralateral eye in several experimental  
 124 sessions. During the imaging sessions, head-fixed mice were free to run on a rotating disc.  
 125 Locomotion velocity was recorded and pupil diameter was extracted from video of the animal's right  
 126 eye. **(B)** Example of an ISI map. **(C)** Example frame from a two-photon movie. Imaging data was  
 127 processed as described in de Vries et al. (2020) to obtain  $\Delta F/F_0$  traces. **(D)** Schematic of the 5  
 128 visual areas targeted in this study. **(E)** 10 randomized blocks of twelve 30 s movie stimuli were  
 129 presented. 4 s of mean-luminance grey was presented between stimuli. The first 60 s was mean-  
 130 luminance grey (spontaneous activity); the second 60 s period was a high-contrast sparse noise  
 131 stimulus (not analyzed in this work). **(F)** Still frames from the 8 naturalistic (left) and 4 artificial  
 132 (right) movie stimuli (see **Stimuli**). Two of the naturalistic stimuli, "mouse montage 1" and  
 133 "mousecam", were phase-scrambled to destroy high-level image features while closely matching  
 134 low-order statistics (see **Phase scrambling**). **(G)**  $\Delta F/F_0$  traces from 5 example cells, locomotion  
 135 velocity, and normalized pupil diameter from a representative experimental session. *Note:* the "man  
 136 writing" stimulus frame in (F) has been de-identified for presentation in this preprint in accordance  
 137 with bioRxiv policy.

138 To measure ND, we employed a method from Mensen et al. (2018) for analyzing a set of  
 139 timeseries recorded during the presentation of a continuous stimulus (**Figure 2**). Briefly, the  
 140 power spectrum of each cell's  $\Delta F/F_0$  trace was estimated in 1 s windows. The cells' power  
 141 spectra during simultaneous windows were concatenated to form a vector representing the  
 142 neurophysiological state of the population during that window. We calculated ND for each trial  
 143 as the median Euclidean distance between the 30 population states elicited over the course of  
 144 the 30 s stimulus. We computed distances in the frequency domain rather than the time domain  
 145 in order to focus on differences in overall population state rather than differences in precise  
 146 timing of  $\Delta F/F_0$  transients. To account for variability in the size of the imaged populations we  
 147 divided ND values by the square root of the number of cells (see **Spectral differentiation**).  
 148 Spectral differentiation will be zero when the set of  $\Delta F/F_0$  traces is perfectly periodic with a  
 149 period of 1 s (the window size), and it will be high when many traces exhibit temporally varied  
 150 patterns across the 30 seconds. The measure scales with the magnitude of the signal and thus  
 151 has no well-defined maximum.

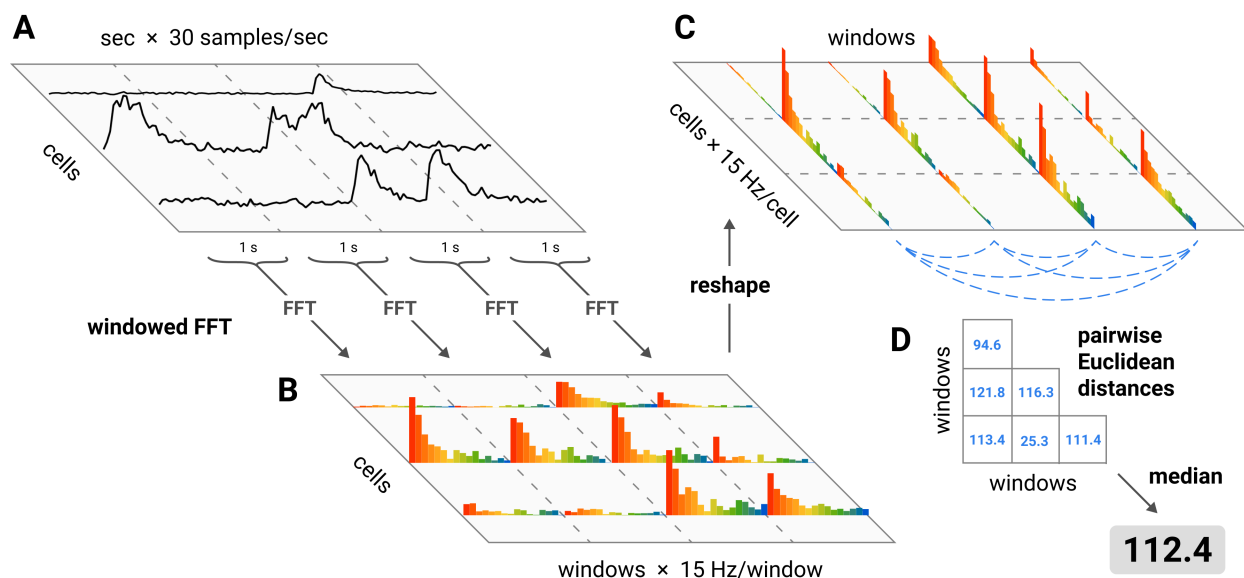

152  
 153 **Figure 2. Spectral differentiation analysis.** ND was computed as follows: **(A)** for each cell, the  
 154  $\Delta F/F_0$  trace of each cell during stimulus presentation was divided into 1 s windows; **(B)** the power  
 155 spectrum of each window was estimated; **(C)** the "neurophysiological state" during each 1 s window  
 156 was defined as a vector in the high-dimensional space of cells and frequencies (*i.e.*, the

157 concatenation of the power spectra in that window for each cell); **(D)** the ND in response to a given  
158 stimulus was calculated as the median of the pairwise Euclidean distances between every state  
159 that occurred during the stimulus presentation.

160 To compare the differentiation of responses to naturalistic and artificial stimuli, we generated  
161 Fourier phase-scrambled versions of two of our movie stimuli (**Figure 1G**). Phase-scrambling  
162 destroys the natural structure of the stimulus while closely matching the power spectrum (the  
163 spectrum was not conserved exactly because of numerical representational limitations of the  
164 stimulus format; see **Phase scrambling**). Note that operations that leave the power spectrum of  
165 a signal unchanged will not affect its spectral differentiation.

166 For the “mouse montage 1” stimulus (a montage of six 5 s naturalistic movie clips), we  
167 performed the phase-scrambling in two ways: (1) along the temporal dimension, on each pixel  
168 independently, and (2) along the two spatial dimensions, on all pixels. For the “mousecam”  
169 stimulus (a continuous 30 s clip of movement at ground level through the underbrush of a forest)  
170 we performed only the spatial phase-scrambling. This yielded 2 unscrambled stimuli and 3  
171 scrambled stimuli. The full set of twelve stimuli was designed to span different levels of putative  
172 ethological relevance; here, we focus on the comparison of the unscrambled stimuli to their  
173 scrambled versions because low-order stimulus statistics are controlled and thus the contrast  
174 can be more easily interpreted.

## 175 **2.1 Unscrambled stimuli elicit more differentiated responses compared to** 176 **scrambled stimuli**

177 We hypothesized that the unscrambled stimuli would elicit higher ND than their phase-  
178 scrambled counterparts. We tested this by fitting linear mixed effects (LME) models with  
179 experimental session as a random effect (see **Linear mixed effects models**); mean differences  
180 in ND of responses to unscrambled vs. scrambled stimuli are shown in **Figure 3**. We obtained  
181 similar results contrasting naturalistic vs. artificial stimuli across the entire stimulus set  
182 (**Supplementary Figure 1**). ND values were approximately log-normally distributed, so we  
183 applied a logarithmic transform to ND in all statistical analyses (see **Statistics**).

### 184 **2.1.1 Increased differentiation for unscrambled stimuli is specific to excitatory cells in** 185 **L2/3**

186 We found that unscrambled stimuli elicited more differentiated responses specifically in L2/3  
187 (**Figure 3A**). We fitted an LME model with stimulus category (unscrambled or scrambled), layer,  
188 and their interaction as fixed effects and found a significant interaction (likelihood ratio test,  $\chi^2(2)$   
189 = 13.379,  $p = 0.00124$ ). Post hoc tests showed that the unscrambled vs. scrambled difference  
190 was specific to L2/3 (one-sided z-test; L2/3,  $z = 3.866$ ,  $p = 1.66e-4$ ; L4,  $z = 0.191$ ,  $p = 0.810$ ;  
191 L5,  $z = -1.168$ ,  $p = 0.998$ ; adjusted for multiple comparisons).

### 192 **2.1.2 Increased differentiation for unscrambled stimuli is specific to areas AL and AM**

193 The increased ND in response to unscrambled stimuli was area-specific (**Figure 3B**). We fitted  
194 an LME model with stimulus category, area, and their interaction as fixed effects and found a  
195 significant interaction (likelihood ratio test,  $\chi^2(4) = 15.202$ ,  $p = 0.00430$ ). Post hoc tests showed  
196 that the unscrambled vs. scrambled difference was specific to AL and AM (one-sided z-test; V1,  
197  $z = 0.704$ ,  $p = 0.7479$ ; L,  $z = -0.234$ ,  $p = 0.9887$ ; AL,  $z = 2.873$ ,  $p = 0.0101$ ; PM,  $z = -1.843$ ,  $p >$   
198  $0.999$ ; AM,  $z = 2.446$ ,  $p = 0.0356$ ; adjusted for multiple comparisons).

199

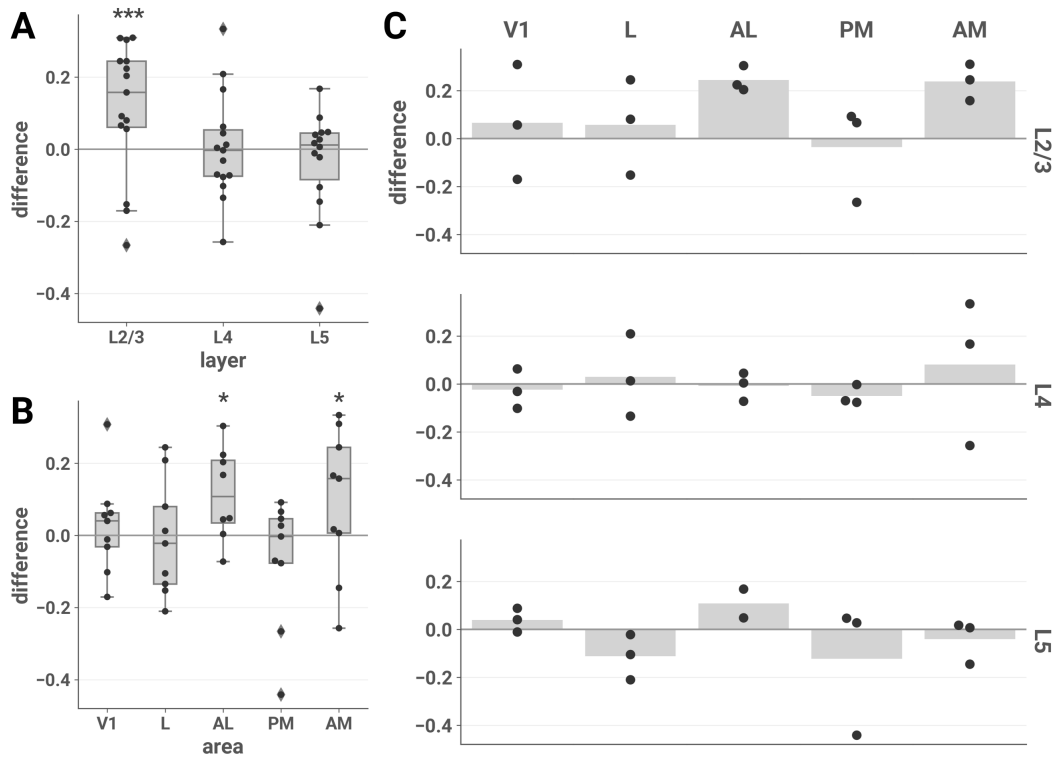

200

201 **Figure 3. ND elicited by unscrambled vs. scrambled stimuli is higher in L2/3 of areas AL and**  
 202 **AM.** The mean difference in ND of responses to unscrambled vs. scrambled stimuli is plotted for  
 203 each session by layer (A), area (B), and layer-area pair (C). (A) and (B): asterisks indicate  
 204 significant post hoc one-sided z-tests in the layer (A) and area (B) interaction LME models (\*,  $p <$   
 205  $0.05$ ; \*\*\*,  $p < 0.001$ ). Boxes indicate quartiles; whiskers indicate the minimum and maximum of data  
 206 lying within 1.5 times the inter-quartile range of the 25% or 75% quartiles; diamonds indicate  
 207 observations outside this range. (C) Mean values are indicated by bars.

## 208 2.2 Permutation tests for individual experimental sessions

209 The above analysis shows that the mean ND elicited by unscrambled stimuli is greater than for  
 210 their phase-scrambled counterparts, and that this effect is driven by L2/3 cells in areas AL and  
 211 AM. We also analyzed ND at the level of individual sessions with non-parametric permutation  
 212 tests. For each session, we obtained a null distribution by randomly permuting the trial labels  
 213 (unscrambled or scrambled) 20,000 times and computing the difference in mean ND on  
 214 unscrambled vs. scrambled trials for each permutation. P values were computed as the fraction  
 215 of permutations for which the permuted difference was greater than the observed difference.

216 The results of the individual session analyses were consistent with the LME analyses (**Table 1**).  
 217 In all sessions recorded from L2/3 of AL & AM, responses to unscrambled stimuli were  
 218 significantly more differentiated than to scrambled stimuli ( $p < 0.05$ ).  
 219



|            | V1    | L     | AL    | PM    | AM    | All areas |
|------------|-------|-------|-------|-------|-------|-----------|
| L2/3       | 1 / 3 | 1 / 3 | 3 / 3 | 0 / 3 | 3 / 3 | 8 / 15    |
| L4         | 0 / 3 | 1 / 3 | 0 / 3 | 0 / 3 | 0 / 3 | 1 / 15    |
| L5         | 0 / 3 | 0 / 3 | 0 / 2 | 0 / 3 | 0 / 3 | 0 / 14    |
| All layers | 1 / 9 | 2 / 9 | 3 / 8 | 0 / 9 | 3 / 9 |           |

220

221

222

223

224

225

226

227

228

Table 1. **Permutation tests show increased ND for unscrambled vs. scrambled stimuli in L2/3 of AL & AM at the level of individual experimental sessions.** Entries contain the fraction of sessions in which the mean ND of responses to unscrambled stimuli was significantly greater than responses to their scrambled counterparts vs. total number of sessions at a threshold of  $\alpha = 0.05$ . For each session, a null distribution was obtained by randomly permuting trial labels (unscrambled or scrambled) 20,000 times and computing the difference in mean ND on unscrambled and scrambled trials for each permutation. P values were computed as the fraction of permutations for which the permuted difference was greater than the observed difference.

229

230

231

232

233

234

235

236

237

238

239

Locomotion and pupil diameter can be considered behavioral indications of engagement with the environment (Jacobs et al., 2018; Ganea et al., 2018; Bennett et al., 2013) and modulate neuronal activity in visual cortex (Dadarlat & Stryker, 2017; McGinley, David, et al., 2015; McGinley, Vinck, et al., 2015; Niell & Stryker, 2010; Polack et al., 2013; Reimer et al., 2014; Salkoff et al., 2020; Vinck et al., 2015). We found that in L2/3 of AL & AM, effect sizes were positively correlated with locomotion activity (**Figure 4**, top left; Pearson's  $r = 0.896$ ; two-sided  $t$ -test;  $t(4) = 4.030$ ,  $p = 0.0157$ ) and pupil diameter (**Figure 4**, top right;  $r = 0.716$ ;  $t(42) = 2.054$ ,  $p = 0.109$ ), suggesting that the difference in ND is more clear when the animal is engaged with the stimuli. This pattern was not evident when considering all cell populations (locomotion activity: **Figure 4**, bottom left,  $r = -0.034$  ( $t(42) = -0.220$ ,  $p = 0.827$ ); pupil diameter: **Figure 4**, bottom right,  $r = 0.047$  ( $t(42) = 0.302$ ,  $p = 0.764$ ).

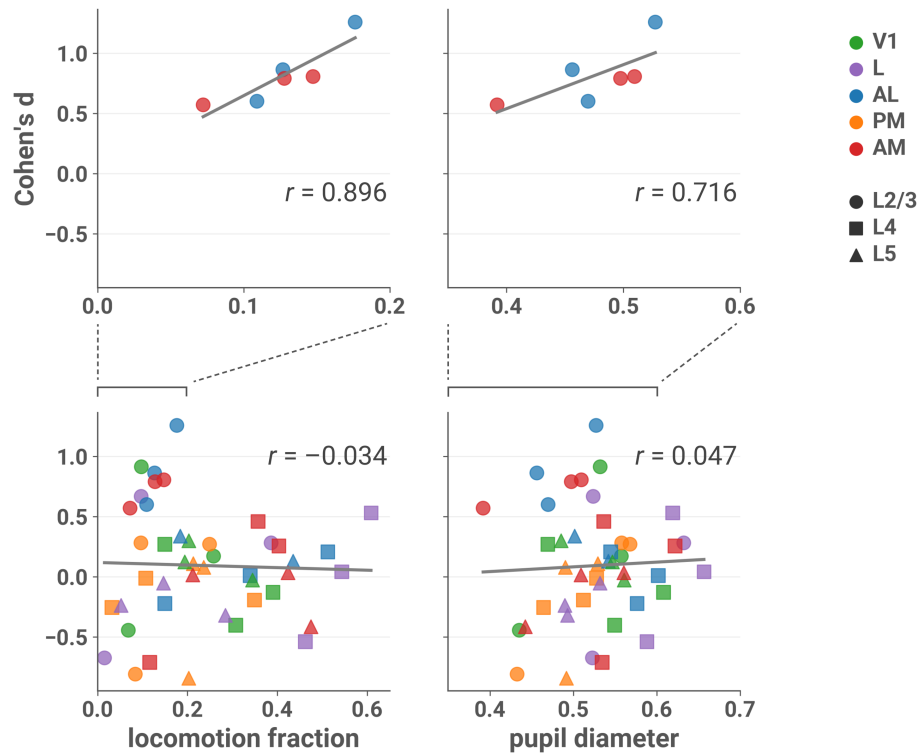

240

241

242

243

244

245

246

247

248

249

Figure 4. **Effect sizes in L2/3 of AL & AM are larger in sessions with more locomotion and larger pupil diameter.** Cohen's  $d$  is plotted against the fraction of locomotion activity (left column) and mean normalized pupil diameter (right column) during the session, with linear fit in grey. Top row: only sessions recorded from L2/3 and areas AL or AM; bottom row: all sessions (note different scales). Top left, Pearson's  $r = 0.896$  (two-sided  $t$ -test;  $t(4) = 4.030$ ,  $p = 0.0157$ ); top right,  $r = 0.716$  ( $t(42) = 2.054$ ,  $p = 0.043$ ); bottom left,  $r = -0.034$  ( $t(42) = -0.220$ ,  $p = 0.827$ ); bottom right,  $r = 0.047$  ( $t(42) = 0.302$ ,  $p = 0.764$ ). Running velocity greater than 2.5 cm/s was considered locomotion activity (see **Locomotion**). Normalized pupil diameter was obtained by dividing by the maximum diameter that occurred during the session (see **Pupillometry**).

250

251

### 2.3 Multivariate analysis also shows increased differentiation for unscrambled stimuli

252

253

254

255

256

257

258

Spectral differentiation is a univariate measure sensitive to differences within a given cell's responses across time. To ensure that our results were not due to this particular measure, we also employed a multivariate approach that considers spatiotemporal differences in activity patterns across the cell population. For each session, the dimensionality of the population response vectors was reduced to 10 using UMAP (McInnes et al., 2018). In the resulting 10-dimensional space, ND was measured as the mean Euclidean distance to the centroid of the set of responses corresponding to that stimulus (see **Multivariate differentiation**).

259

260

261

262

263

264

265

266

The results of the multivariate analysis were consistent with those found using the spectral differentiation measure. The mean centroid distance was higher in response to unscrambled compared to scrambled stimuli (**Figure 5**), and this effect was specific to L2/3 (layer  $\times$  stimulus category interaction: likelihood ratio test,  $\chi^2(2) = 8.263$ ,  $p = 0.0161$ ; post hoc one-sided  $z$ -tests: L2/3,  $z = 3.610$ ,  $p = 0.000459$ ; L4,  $z = 0.397$ ,  $p = 0.720$ ; L5,  $z = -0.202$ ,  $p = 0.926$ ) and areas AL and AM (area  $\times$  stimulus category interaction: likelihood ratio test,  $\chi^2(4) = 15.659$ ,  $p = 0.00351$ ; post hoc tests: V1,  $z = -0.259$ ,  $p = 0.990$ ; L,  $z = -0.828$ ,  $p > 0.999$ ; AL,  $z = 2.546$ ,  $p = 0.0270$ ; PM,  $z = -0.051$ ,  $p = 0.975$ ; AM,  $z = 3.668$ ,  $p = 0.000612$ ).

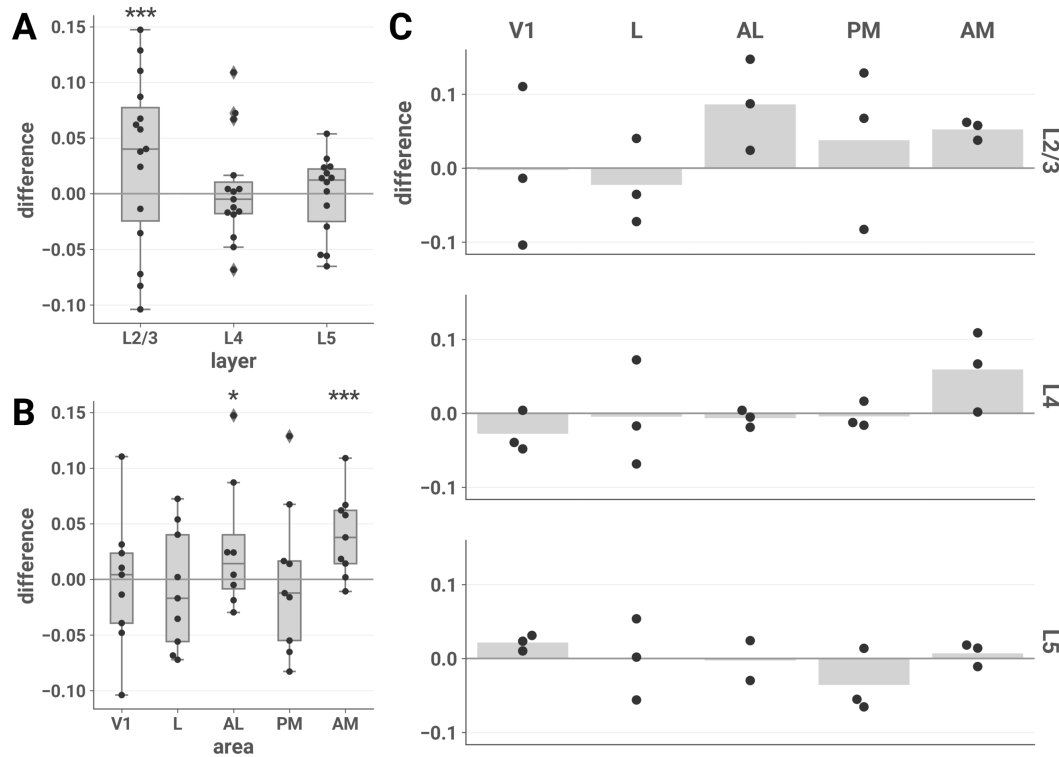

267

268

269

270

271

272

273

274

275

Figure 5. **Multivariate differentiation analysis.** The mean difference in the mean centroid distance of responses to unscrambled vs. scrambled stimuli is plotted for each session by layer (A), area (B), and layer-area pair (C). ND elicited by unscrambled vs. scrambled stimuli is higher in L2/3 and areas AL and AM, consistent with the spectral differentiation analysis. (A) and (B): asterisks indicate significant post hoc one-sided z-tests in the layer (A) and area (B) interaction LME models (\*\*\*,  $p < 0.001$ ). Boxes indicate quartiles; whiskers indicate the minimum and maximum of data lying within 1.5 times the inter-quartile range of the 25% or 75% quartiles; diamonds indicate observations outside this range. (C) Mean values are indicated by bars.

276

## 2.4 Decoding analysis does not reveal layer or area specificity

277

278

279

280

281

282

283

284

We next asked whether the layer and area specificity of our ND results would be reflected in our ability to decode the stimulus category (unscrambled or scrambled) from population responses. We performed fivefold cross-validated linear discriminant analysis to decode stimulus category for each session and scored the classifier using balanced accuracy (see **Decoding analysis**). Decoding performance was high for most areas and layers (**Figure 6**), in contrast to the unscrambled-scrambled difference in ND. Performance was also high across layers and areas when we decoded stimulus identity, rather than category, using responses to all 12 stimuli (**Supplementary Figure 1**).

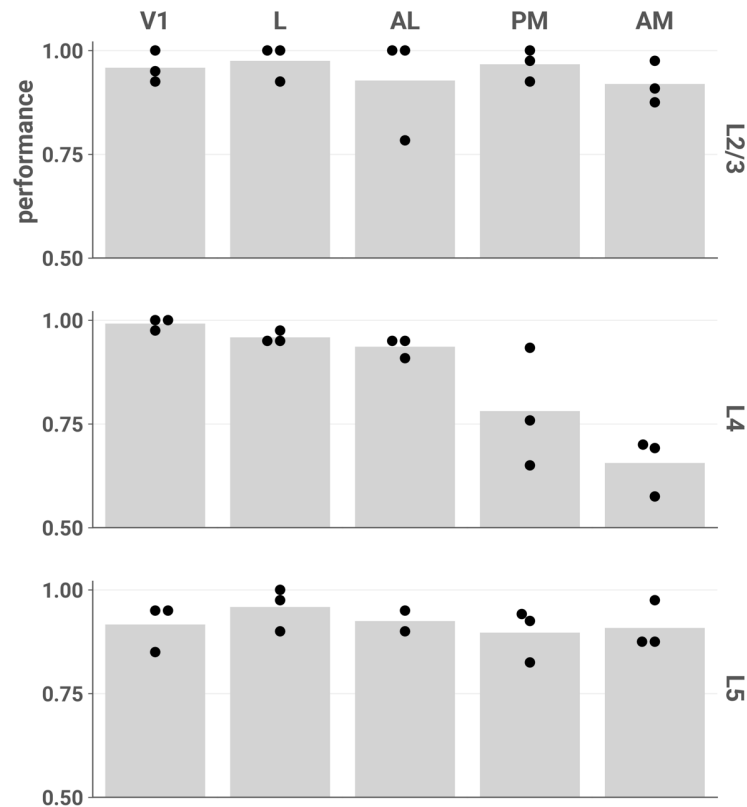

285

286

287

288

289

Figure 6. **Stimulus category (unscrambled or scrambled) can be accurately decoded from most layers and areas.** Each point represents the mean fivefold cross-validated balanced accuracy score of linear discriminant analysis performed on a single session (see **Decoding analysis**). Chance performance is 0.5.

290

291

## 2.5 Differences in ND among individual stimuli

292

293

294

295

296

297

298

299

300

301

302

303

304

305

306

We also investigated whether ND differed among stimuli within the same category. This analysis was restricted to the set of unscrambled stimuli without jump cuts, *i.e.*, the 5 naturalistic continuous 30 s clips, to avoid potential confounds in comparing stimuli with and without abrupt transitions between different scenes. Here we used data from all layers and areas, since although L2/3 of AL & AM underlies unscrambled/scrambled differences, within-category differences might not be restricted to that subset. We fitted an LME model with stimulus as a fixed effect and found it was significant (likelihood ratio test,  $\chi^2(4) = 32.115$ ,  $p = 1.812e-6$ ). Post-hoc pairwise two-sided *t*-tests (adjusted for multiple comparisons), shown in **Figure 7**, revealed that the predator stimulus (a snake) evoked significantly higher differentiation than clips of conspecifics ( $t(2156) = 3.229$ ,  $p = 0.0111$ ); prey (crickets) ( $t(2156) = 3.928$ ,  $p = 0.000839$ ), and a man writing ( $t(2156) = 5.248$ ,  $p = 1.670e-6$ ). The “mousecam” clip of movement through a wooded environment also evoked a significantly higher differentiation than the clip of a man writing ( $t(2156) = 3.396$ ,  $p = 0.00625$ ). Here we present the main effect of stimulus; for an exploration of interactions with layer and area, and a comparison to decoding, see Supplementary Figure 3.

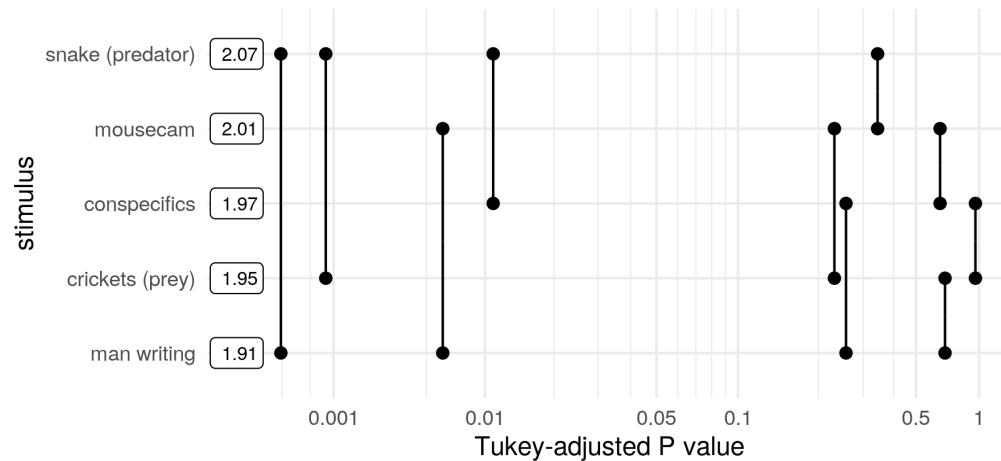

307  
308 Figure 7. **Pairwise differences in ND among unscrambled, continuous stimuli.** Post hoc  
309 pairwise comparisons using data from all neuronal populations are plotted against their p values  
310 (adjusted for multiple comparisons). Boxes show mean ND for each stimulus. ND of the snake  
311 stimulus is significantly greater than that of crickets and man writing at a threshold of  $\alpha = 0.01$ , and  
312 greater than conspecifics at  $\alpha = 0.05$ . ND of the mousecam stimulus is greater than that of man  
313 writing at  $\alpha = 0.01$ .

## 314 2.6 Stimulus differentiation does not explain ND

315 It is possible that ND does not reflect functionally relevant visual processing but is instead  
316 merely inherited from the differentiation of the stimulus itself. To rule out this possibility, we  
317 computed the stimulus differentiation (SD) by treating each pixel of the stimulus as a “cell” and  
318 applying the spectral differentiation measure to the traces of pixel intensities over time. Within  
319 L2/3 of AL and AM, the mean ND elicited by each stimulus was positively correlated with SD  
320 (Pearson’s  $r = 0.446$ , one-sided  $t$ -test;  $t(10) = 1.574$ ,  $p = 0.0733$ ). However, the noise stimulus is  
321 an influential observation (Cook’s  $D = 0.665$ , more than twice as large as the next most  
322 influential observation). If we exclude this stimulus, we find a weaker correlation ( $r = 0.290$ ; one-  
323 sided  $t$ -test;  $t(9) = 0.908$ ,  $p = 0.194$ ). Furthermore, there was no evidence of a relationship with  
324 ND when considering only the scrambled stimuli and their unscrambled counterparts ( $r = -$   
325  $0.537$ ; two-sided  $t$ -test;  $t(3) = -1.104$ ,  $p = 0.350$ ). Thus, we conclude that ND is not inherited  
326 from SD. We also did not find a relationship with stimulus luminance, contrast, or spectral  
327 energy (**Supplementary Figure 4**).

328

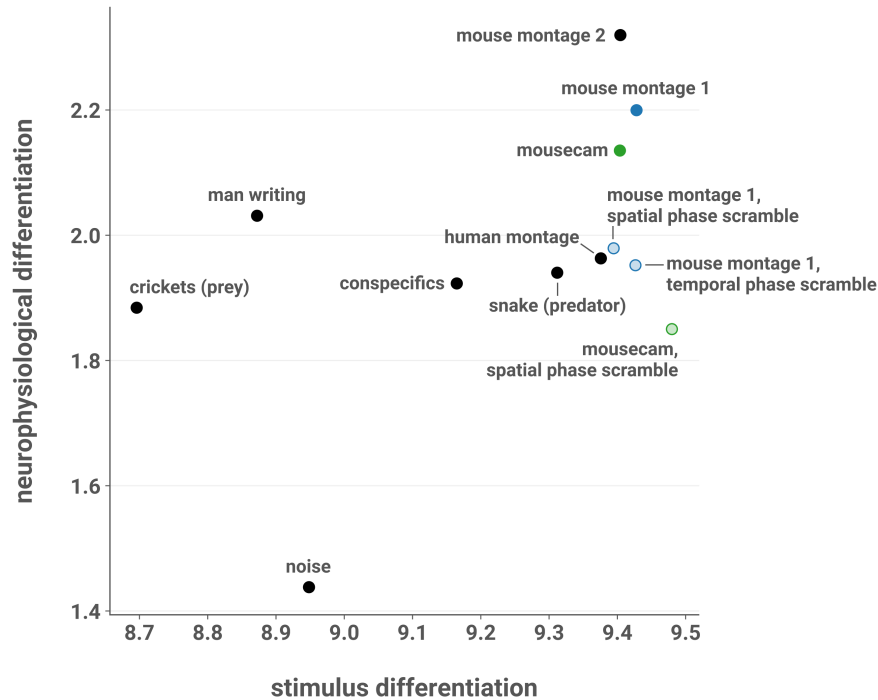

329

330 Figure 8. **SD does not explain ND.** Mean ND elicited by each stimulus in L2/3 of AL and AM,  
331 plotted against SD. SD was computed by treating each pixel of the movie as a “cell” and applying  
332 the spectral differentiation measure to traces of pixel intensities over time. Across all stimuli, mean  
333 ND is positively correlated with SD (Pearson’s  $r = 0.446$ ; one-sided  $t$ -test;  $t(10) = 1.574$ ,  $p =$   
334  $0.0733$ ). However, here the noise stimulus is an influential observation (Cook’s  $D = 0.665$ , more  
335 than twice as large as the next most influential observation). With the noise stimulus excluded,  
336 the correlation is weaker ( $r = 0.290$ ; one-sided  $t$ -test;  $t(9) = 0.908$ ,  $p = 0.194$ ). Moreover, there was no  
337 evidence of a relationship with ND when considering only the scrambled stimuli and their  
338 unscrambled counterparts ( $r = -0.537$ ; two-sided  $t$ -test;  $t(3) = -1.104$ ,  $p = 0.350$ ).

### 339 3 Discussion

340 Our results show that excitatory L2/3 neurons in higher visual areas AL and AM have more  
341 differentiated responses to movie stimuli with naturalistic structure than to phase-scrambled  
342 stimuli with closely matched low-order statistics, indicating that these populations are uniquely  
343 sensitive to high-level natural features in this stimulus set. We found this difference in  
344 neurophysiological differentiation (ND) at the level of single experimental sessions, and it was  
345 robust to complementary methods of measuring ND. Moreover, we found that effect sizes were  
346 larger with increasing pupil diameter and locomotion, suggesting that the increased ND in L2/3  
347 of AL and AM is dependent on the animal’s arousal level and behavioral state. Decoding  
348 analysis showed a marked lack of area and layer specificity: stimulus category could be  
349 accurately decoded from the activity of most cell populations we surveyed. In addition to the  
350 differences between unscrambled and scrambled stimuli, we found differences in ND among  
351 unscrambled continuous stimuli. Finally, we argued that ND is not merely inherited from the  
352 differentiation of the stimuli.

353 The precise functional specialization of individual higher visual areas in the mouse, as well as  
354 that of V1, remains unclear (Glickfeld & Olsen, 2017). Recent large-scale anatomical (J. A.  
355 Harris et al., 2019) and functional (Siegle et al., 2019) studies of feedforward and feedback  
356 connectivity in the mouse visual system have uncovered a “shallow hierarchy” in which V1 lies

357 at the base, followed by LM, RL, AL, and PM, with AM at the top. In this light, our findings that  
358 ND in L2/3 of AL and AM is sensitive to high-level naturalistic structure could be interpreted as a  
359 reflection of hierarchical processing, which may be constructing a richer dynamical repertoire for  
360 perception of naturalistic stimuli at higher hierarchical levels. Interestingly, we did not find this  
361 effect in PM, despite its intermediate position between AL and AM in the hierarchy, suggesting  
362 that such hypothetical processing towards richer repertoires is not fully determined by the one-  
363 dimensional hierarchy, but may involve specific pathways through subsets of higher visual  
364 areas. These observations indicate that differentiation analysis may be used to refine our  
365 understanding of functional specialization of these areas and uncover differences between them  
366 that can be used to direct further investigations and generate hypotheses.

367 A recent study found that feedback projections from higher visual areas to L2/3 excitatory  
368 neurons in V1 create a second receptive field (RF) surrounding the feedforward RF and that  
369 these RFs are mutually antagonistic, pointing to a role for these neurons in predictive  
370 processing (Keller et al., 2020). If this pattern is found at higher levels of the visual hierarchy,  
371 then the layer specificity of our findings could be explained by a scenario in which top-down  
372 feedback inputs to AL and AM from areas higher in the putative dorsal stream (Marshall et al.,  
373 2011; Wang et al., 2012) are integrated with feedforward inputs in L2/3 to compute and relay  
374 prediction errors about high-level visual features. In this scenario, the naturalistic stimuli, which  
375 contain high-level features that are presumably less predictable, would elicit more prediction  
376 errors and thus more differentiated activity.

377 Stimulus-evoked activity in cortex is powerfully modulated by arousal level and behavioral state  
378 (McGinley, Vinck, et al., 2015; Salkoff et al., 2020). Locomotion is associated with heightened  
379 arousal, increased membrane depolarization, increased firing rates, increased signal-to-noise  
380 ratio, and enhanced stimulus encoding (Bennett et al., 2013; Dardlat & Stryker, 2017; Niell &  
381 Stryker, 2010; Polack et al., 2013; Vinck et al., 2015). Pupil diameter can serve as an index of  
382 arousal (Larsen & Waters, 2018), and exhibits an inverted-U relationship with task performance  
383 such that performance is optimal at intermediate arousal levels (McGinley, David, et al., 2015;  
384 McGinley, Vinck, et al., 2015). Larger pupils are associated with increases in the gain,  
385 amplitude, signal-to-noise ratio, and reliability of responses in V1 (Reimer et al., 2014). Thus,  
386 our finding that increased pupil diameter and locomotion activity are associated with larger  
387 effect sizes could be explained by an increase in response gain or amplitude in V1 that is  
388 inherited by downstream AL and AM: since the ND in these areas is selective for naturalistic  
389 structure, increased bottom-up drive could accentuate unscrambled-scrambled differences in  
390 ND.

391 Alternatively, response gain or amplitude in higher visual areas could be modulated directly by  
392 subcortical arousal systems. The noradrenergic and cholinergic systems are likely candidates,  
393 although it is not clear why noradrenergic modulation would cause an effect specific to L2/3; as  
394 for cholinergic modulation, Pafundo et al. (2016) showed that V1 and LM are differentially  
395 modulated by basal forebrain stimulation such that the response gain and reliability of excitatory  
396 L2/3 neurons was enhanced in V1 but not in LM, despite an even distribution of basal forebrain  
397 axon fibers across all layers in both areas. However, neuromodulatory regulation of activity in  
398 other higher visual areas, in particular AL and AM, has not yet been characterized in great detail  
399 and would be a fruitful topic for future studies. Another possibility is a top-down effect, in which  
400 increases in arousal and locomotion reflect increased cognitive or attentional engagement with  
401 the stimuli that favors processing of high-level stimulus features, selectively increasing ND for  
402 the unscrambled stimuli. In the passive viewing paradigm employed here, in which the animal is  
403 not motivated to attend to the stimuli, it is likely that top-down modulation of sensory processing  
404 varies considerably across the experimental session as arousal and attention fluctuate.

405 Though differentiation analysis revealed area- and layer-specific differences in responses to  
406 unscrambled and phase-scrambled stimuli, our ability to decode stimulus category from neural  
407 responses was remarkably similar across areas and layers. This contrast in our results  
408 highlights an important methodological distinction: decoding is a powerful means to reveal  
409 information content, but this information is necessarily measured from the extrinsic perspective  
410 (Buzsáki, 2019, Tononi, 2004; Oizumi et al., 2014; Tononi et al., 2016). The presence of  
411 information about a stimulus in a neural circuit does not imply that the information is functionally  
412 relevant to the system in question (Brette, 2019). As an extreme example, stimulus category  
413 would presumably be perfectly decodable from photons impinging on the retina, but this would  
414 reveal nothing of interest about perception. By contrast, ND is an intrinsic measure in the sense  
415 that it is defined without reference to a stimulus (Boly et al., 2015; Mensen et al., 2017, 2018). In  
416 the brain, a complex evolved system in which activity is energetically costly, ND may be a  
417 signature of functionally relevant dynamics. The dissociation we find between ND and decoding  
418 performance indicates that differentiation analysis can point to populations of interest that are  
419 not revealed by detecting stimulus-relevant information.

420 Finally, we also found that the predator stimulus and the “mousecam” stimulus elicited  
421 significantly higher ND than other unscrambled continuous stimuli. The predator stimulus finding  
422 is intriguing because that stimulus has lower luminance, contrast, and spectral energy than the  
423 clip of conspecifics in a home cage (**Supplementary Figure 4**). Given the importance of  
424 detecting natural predators, it is plausible that the high ND evoked by this stimulus reflects its  
425 particular salience to the visual system, driven by high-level features such as the presence of  
426 the predator rather than low-order stimulus statistics. In any case, this demonstrates that  
427 differentiation analysis can be used to probe differences in visual responses at the level of  
428 individual stimuli.

429 It is important to keep in mind the limitations of the data we collected. Firstly, calcium imaging  
430 provides only an imperfect proxy of neuronal activity: simultaneous juxtacellular  
431 electrophysiology indicates that the fluorescence signal from Ca<sup>2+</sup> indicators is more sensitive to  
432 bursts of action potentials than sparse, low-frequency spiking (Chen et al., 2013; Huang et al.,  
433 2020; Ledochowitsch et al., 2019; Siegle et al., 2020; Wei et al., 2020). Such activity may  
434 contribute to ND but would not be present in this dataset. However, given the typically sparse  
435 response properties of L2/3 excitatory neurons compared to those in deeper layers (Barth &  
436 Poulet, 2012), it is possible that this limitation may only obscure even stronger L2/3 specificity.  
437 Secondly, for this exploratory study we opted to use a range of naturalistic stimuli and a limited  
438 number of phase-scrambled control stimuli in order to include diverse high-level features. Future  
439 studies measuring stimulus-evoked ND could test our findings using a larger set of artificial  
440 stimuli that control for other low-level stimulus characteristics, *e.g.* optical flow, in addition to the  
441 power spectrum. Thirdly, there was considerable variability in arousal state and locomotor  
442 activity in our passive viewing paradigm. Given these factors’ modulation of effect size, future  
443 work might uncover larger effects by employing an active paradigm in which the animal is  
444 motivated by reward to attend to the stimuli.

445 In summary, we measured stimulus-evoked differentiation of neural activity with cellular  
446 resolution and found increased ND in response to unscrambled versus scrambled stimuli. This  
447 effect was driven by L2/3 excitatory cells in AL and AM and was enhanced at higher arousal  
448 levels. To our knowledge, the present study is the first to systematically measure stimulus-  
449 evoked differentiation with cellular resolution across multiple cortical areas and layers. These  
450 results advance our understanding of the functional differences among higher visual areas, and  
451 future work should seek to integrate our findings into the emerging picture of a shallow hierarchy  
452 in the mouse visual system, for example by investigating potential differences in



453 neuromodulation among these areas or the contrast between AL/AM and PM. Differentiation  
454 analysis is motivated by IIT, and provides an “intrinsic” analytical approach that can complement  
455 “extrinsic” measures such as decoding performance, which in this dataset did not distinguish  
456 specific cell populations. This method can be used to compare individual stimuli and may  
457 provide a readout of the degree to which a given stimulus induces a rich and varied perceptual  
458 experience. Future studies should investigate stimulus-evoked differentiation with cellular  
459 resolution in humans (and perhaps non-human primates), where subjective reports are  
460 available, and thereby determine the relative contributions of distinct cell populations to ND  
461 while correlating ND with phenomenology.

## 462 **4 Methods**

463 The AIBS optical physiology pipeline is described in detail in de Vries et al. (2020) and  
464 Groblewski et al. (2020). Analysis was performed with custom Python and R code using numpy  
465 (C. R. Harris et al., 2020), scipy (Virtanen et al., 2020), pandas (Reback et al., 2020), scikit-  
466 learn (Pedregosa et al., 2011), matplotlib (Hunter, 2007), seaborn (Waskom & the seaborn  
467 development team, 2020), lme4 (Bates et al., 2015, p. 4), multcomp (Hothorn et al., 2008), and  
468 emmeans (Lenth, 2020).

### 469 **4.1 Transgenic mice**

470 All animal procedures were approved by the Institutional Animal Care and Use Committee at the  
471 AIBS. We maintained all mice on reverse 12-hour light cycle following surgery and throughout  
472 the duration of the experiment and performed all experiments during the dark cycle. We used  
473 the transgenic mouse line Ai93, in which GCaMP6f expression is dependent on the activity of  
474 both Cre recombinase and the tetracycline controlled transactivator protein (tTA) (Madisen et  
475 al., 2010). Triple transgenic mice (Ai93, tTA, Cre) were generated by first crossing Ai93 mice  
476 with Camk2a-tTA mice, which preferentially express tTA in forebrain excitatory neurons.

477 Cux2-CreERT2;Camk2a-tTA;Ai93(TITL-GCaMP6f) expression is regulated by the tamoxifen-  
478 inducible Cux2 promoter, induction of which results in Cre-mediated expression of GCaMP6f  
479 predominantly in superficial cortical layers 2, 3 and 4. Rorb-IRES2-Cre;Cam2a-tTA;Ai93 exhibit  
480 GCaMP6f in excitatory neurons in cortical layer 4 (dense patches) and layers 5 & 6 (sparse).  
481 Rbp4-Cre;Camk2a-tTA;Ai93 exhibit GCaMP6f in excitatory neurons in cortical layer 5.

### 482 **4.2 Surgery**

483 Transgenic mice expressing GCaMP6f were weaned and genotyped at ~P21, and surgery was  
484 performed between P37 and P63. The craniotomy was centered at X = -2.8 mm and Y = 1.3  
485 mm with respect to lambda (centered over the left mouse visual cortex). A circular piece of skull  
486 5 mm in diameter was removed, and a durotomy was performed. A coverslip stack (two 5 mm  
487 and one 7 mm glass coverslip adhered together) was cemented in place with Vetbond.  
488 Metabond cement was applied around the cranial window inside the well to secure the glass  
489 window.

### 490 **4.3 Intrinsic imaging**

491 A retinotopic map was created using intrinsic signal imaging (ISI) in order to define visual area  
492 boundaries and target in vivo two-photon calcium imaging experiments to consistent retinotopic  
493 locations. These maps were generated while mice were lightly anesthetized with 1–1.4%  
494 isoflurane. See de Vries et al. (2020) for a complete description of this procedure and related  
495 processing steps.

#### 496 **4.4 Habituation**

497 Following successful ISI mapping, mice spent two weeks being habituated to head fixation and  
498 visual stimulation. During the second week, mice were head-fixed and presented with visual  
499 stimuli, starting for 10 minutes and progressing to 50 minutes of visual stimuli by the end of the  
500 week. During this week they were exposed to the “mouse montage 2” stimulus (see **Stimuli**).

#### 501 **4.5 Imaging**

502 Calcium imaging was performed using a two-photon-imaging instrument (Nikon A1R MP+).  
503 Laser excitation was provided by a Ti:Sapphire laser (Chameleon Vision – Coherent) at 910 nm.  
504 Mice were head-fixed on top of a rotating disc and free to run at will. The screen center was  
505 positioned 118.6 mm lateral, 86.2 mm anterior and 31.6 mm dorsal to the right eye. The  
506 distance between the screen and the eye was 15 cm. Movies were recorded at 30 Hz using  
507 resonant scanners over a 400  $\mu\text{m}$  field of view.

508 Excitatory neurons from cortical L2/3, L4, and L5 were imaged (L2/3: 3 mice, 15 sessions; L4: 3  
509 mice, 15 sessions; L5: 3 mice, 14 sessions) in 5 visual areas: V1 (9 sessions), L (9 sessions),  
510 AL (8 sessions), AM (9 sessions), and PM (9 sessions).

#### 511 **4.6 Behavioral data**

##### 512 **4.6.1 Locomotion**

513 Locomotion velocity data recorded from the running wheel were preprocessed as follows. First,  
514 artifacts were removed using custom code that iteratively identified large positive or negative  
515 peaks (indicative of artifactual discontinuities in the signal) in several passes of  
516 `scipy.signal.find_peaks` (specific parameters were manually chosen for each session).  
517 Remaining artifacts were then manually removed by inspecting the resulting timeseries and  
518 visually identifying clear discontinuities. The removed samples were filled using linear  
519 interpolation (`pandas.Series.interpolate`).

520 The resulting signal was then low-pass filtered at 1 Hz using a zero-phase 4<sup>th</sup>-order Butterworth  
521 filter (`scipy.signal.butter(2, 1/15, btype='lowpass', output='ba', analog=False)`) applied  
522 with `scipy.signal.filtfilt`).

523 For the analysis in Figure 4, the fraction of time spent running was computed by binarizing the  
524 preprocessed velocity timeseries at a threshold of 2.5 cm/s.

##### 525 **4.6.2 Pupillometry**

526 Pupil diameter was extracted from video of the mouse's ipsilateral eye (relative to the stimulus  
527 presentation monitor) using the AllenSDK (<https://github.com/AllenInstitute/AllenSDK>) as  
528 described in de Vries et al. (2020).

529 Briefly, for each frame of the video an ellipse was fitted to the region corresponding to the pupil  
530 as follows: a seed point within the pupil was identified via convolution with a black square; 18  
531 rays were drawn starting at this seed point, spaced 20 degrees apart; the candidate boundary  
532 point between the pupil and iris along that ray was identified by a change in pixel intensity above  
533 a session-specific threshold; a RANSAC algorithm was used to fit the an ellipse to the candidate  
534 boundary points using linear regression with a conic section constraint; and fitted parameters of  
535 the regression were converted to ellipse parameters (coordinates of the center, lengths of the

536 semi-major and semi-minor axes, and angle of rotation with respect to the x-axis). Pupil  
537 diameter was taken to be twice the semi-major axis of the fitted ellipse.

538 The resulting timeseries contained some artifacts, which we removed by the same combination  
539 of automated and manual methods used for the locomotion timeseries (see **Locomotion**).

540 For the analysis shown in Figure 4, each pupil diameter timeseries was normalized by dividing  
541 by the maximum diameter that occurred during stimulus presentations.

## 542 **4.7 Stimuli**

543 We created twelve 30 s greyscale naturalistic and artificial movie stimuli.

544 The eight naturalistic stimuli (**Figure 9**, top) consisted of three montages of six 5 s clips, spliced  
545 together with jump cuts, and four continuous stimuli. The “mouse montage 1” stimulus contained  
546 clips of conspecifics, a snake, movement at ground level through the underbrush of a wooded  
547 environment, and a cat approaching the camera. The “mouse montage 2” stimulus contained  
548 different footage of movement through the wooded environment; different footage of a cat  
549 approaching the camera; conspecifics in a home cage filmed from within the cage; crickets in a  
550 home cage filmed from within the cage; footage of the interior of the home cage with  
551 environmental enrichment (a shelter, running wheel, and nesting material); and a snake filmed  
552 at close range orienting towards the camera. The “human montage” contained clips of a man  
553 talking animatedly to an off-screen interviewer; a café table where food is being served;  
554 automobile traffic on a road viewed from above; a woman in the foreground taking a photo of a  
555 city skyline; footage of a road filmed from the passenger seat of a vehicle; and a close shot of a  
556 bowl of fruit being tossed. The four continuous stimuli were: footage of a snake at close range  
557 orienting towards the camera; crickets in a home cage filmed from within the cage; a man  
558 writing at a table; movement through a wooded environment at ground level; and conspecifics in  
559 a home cage. No two stimuli contained identical clips.

560 The four artificial stimuli (**Figure 9**, bottom) consisted of two phase-scrambled versions of the  
561 “mouse montage 1” stimulus, a phase-scrambled version of the “mousecam” stimulus (see  
562 **Phase scrambling**), and a high-pass-filtered  $1/f$  noise stimulus.

563 The stimuli were presented in a randomized block design with 10 repetitions, with 4 s of static  
564 mean-luminance grey presented between stimuli (**Figure 1F**). 60 s of mean-luminance grey (to  
565 record spontaneous activity) and a 60 s high-contrast sparse noise stimulus were also  
566 presented in the beginning of each session (this stimulus was not analyzed in this work).

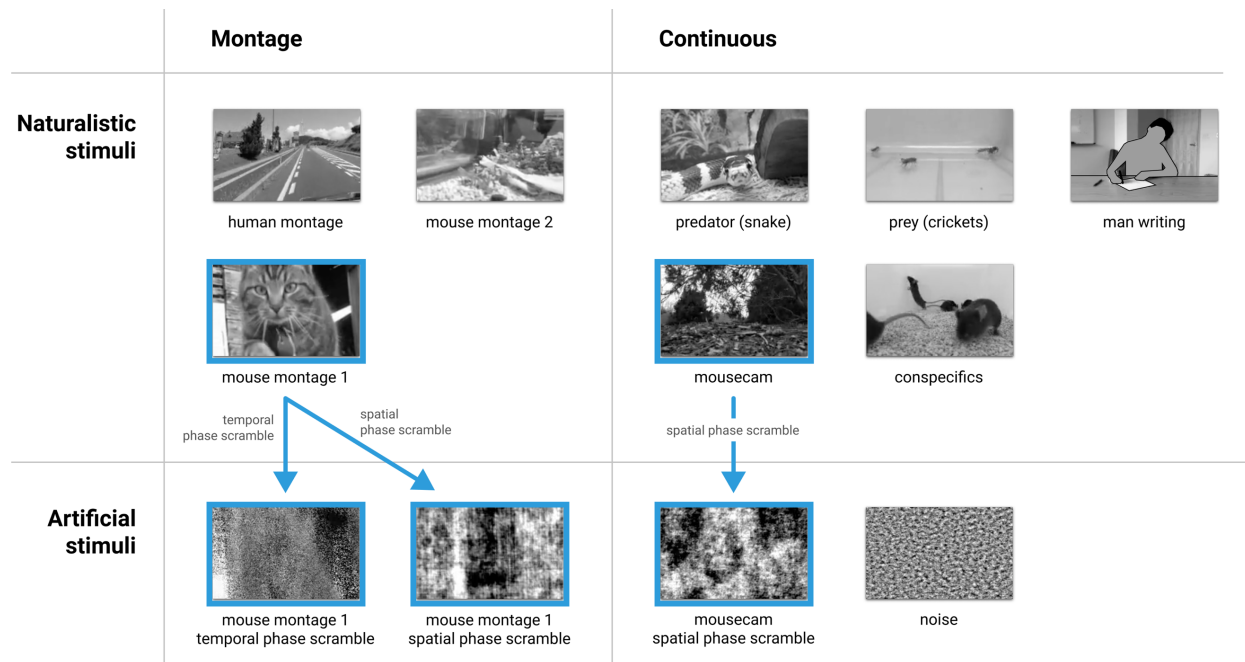

567

568 Figure 9. **Stimuli.** Twelve 30 s long greyscale naturalistic (top) and artificial (bottom) movie stimuli  
 569 were presented. Left: montages of six 5 s clips; right: continuous 30 s clips. Stimuli used in the  
 570 main analysis are outlined in blue. Arrows indicate the phase-scrambling procedures. *Note:* the  
 571 “man writing” stimulus frame has been de-identified for presentation in this preprint in accordance  
 572 with bioRxiv policy.

#### 573 4.7.1 Phase scrambling

574 Two methods of phase scrambling were used: temporal and spatial, described in detail below.  
 575 Briefly, for the temporal scrambling we independently randomized the phase of each pixel’s  
 576 intensity timeseries in contiguous, nonoverlapping windows of 1 s. For the spatial scrambling,  
 577 we randomized the phase of the spatial dimensions of the three-dimensional spectrum of each  
 578 window. The “mouse montage 1” stimulus was phase-scrambled using both procedures to  
 579 obtain the “mouse montage 1, temporal phase scramble” and “mouse montage 1, spatial phase  
 580 scramble” stimuli. The “mousecam” stimulus was scrambled using the spatial procedure to  
 581 obtain the “mousecam, spatial phase scramble” stimulus.

#### 582 Temporal phase scramble

583 First, the stimuli were windowed into contiguous, nonoverlapping 1 s segments (30 frames  
 584 each). For each 1 s window, we applied the following procedure:

585 We estimated the one-dimensional spectrum of each pixel’s intensity timeseries with the  
 586 discrete Fourier transform (DFT) using the NumPy function `numpy.fft.fft`. The phase and  
 587 magnitude of each spectrum were computed with `numpy.angle` and `numpy.abs` respectively. For  
 588 each pixel, we generated a 14-element random vector drawn uniformly from the interval  $[0, 2\pi]$ .  
 589 A randomized phase was then obtained for that pixel by concatenating the first element of the  
 590 original phase, the random vector, the 15<sup>th</sup> element of the original phase, and the negative  
 591 reversed random vector. This yielded a 30-element phase vector with the required conjugate  
 592 symmetry of the spectrum of a 1 s real-valued signal sampled at 30 frames per second. The  
 593 randomized phase was then combined with the spectral magnitude and transformed back into  
 594 the time domain with the inverse DFT using `numpy.fft.ifft`, yielding a temporally phase-

595 scrambled version of that pixel's intensity timeseries. Each pixel's timeseries was independently  
596 phase-scrambled in this fashion.

597 This resulted in 30 independently phase-scrambled 1 s windows. These windows were then  
598 concatenated to obtain the full 30 s temporally phase-scrambled stimulus.

### 599 **Spatial phase scramble**

600 First, the stimuli were windowed into contiguous, nonoverlapping 1 s segments (30 frames  
601 each). For each window, we applied the following procedure. The three-dimensional Fourier  
602 spectrum (frame, width, and height) was estimated with the DFT using `numpy.fft.fftn`. The  
603 phase and magnitude of the spectrum were computed with `numpy.angle` and `numpy.abs`  
604 respectively. To randomize the phase in the spatial dimensions, we generated a random signal  
605 in the time domain with the same dimensions as a stimulus frame (192 pixels wide by 120 pixels  
606 high) and computed its phase in the frequency domain as described above. This two-  
607 dimensional random spatial phase was added to the spatial dimensions of the three-  
608 dimensional stimulus phase. After being randomized in this way, the stimulus phase was  
609 recombined with the spectral magnitude and transformed back into a time-domain signal with  
610 the inverse DFT using `numpy.fft.ifftn`. The 30 resulting phase-scrambled 1 s windows were  
611 then concatenated to obtain the full 30 s spatially phase-scrambled stimulus.

### 612 **Effect of phase-scrambling**

613 The greyscale movie stimuli were represented in the stimulus presentation software as arrays of  
614 unsigned 8-bit integers. The limitations of this representation resulted in phase-scrambled  
615 stimuli with power spectra that were close but not identical to the power spectrum of their  
616 unscrambled counterparts.

617 Specifically, although the phase scrambling procedures described above leave the power  
618 spectrum unchanged, they do not necessarily preserve the range of the resulting real-valued  
619 signal. In our case, applying these procedures to our stimuli resulted in phase-scrambled stimuli  
620 in which the pixel intensities occasionally lay outside the range [0, 255]. Thus, in order to  
621 represent the phase-scrambled stimuli with 8-bit integers, we truncated the result so that  
622 negative intensities were set to 0 and intensities greater than 255 were set to 255. This  
623 operation does affect the power spectra, and as a result the spectra of the unscrambled and  
624 scrambled stimuli are closely matched but not equal.

## 625 **4.8 Differentiation analysis**

### 626 **4.8.1 Spectral differentiation**

627 Our analysis of the responses to the stimuli follows the techniques developed in previous work  
628 in humans (Boly et al., 2015; Mensen et al., 2017, 2018). The spectral differentiation measure of  
629 ND used by Mensen et al. (2018) was designed for analysis of timeseries responses to  
630 continuous movie stimuli, and was found to be positively correlated with subjective reports of  
631 stimulus "meaningfulness". We employed this measure with our  $\text{Ca}^{2+}$  imaging data: (A) for each  
632 cell, the  $\Delta F/F_0$  trace of each cell during stimulus presentation was divided into 1 s windows; (B)  
633 the power spectrum of each window was estimated using a Fourier transform; (C) the  
634 "neurophysiological state" during each 1 s window was defined as a vector in the high-  
635 dimensional space of cells and frequencies (*i.e.*, the concatenation of the power spectra in that  
636 window for each cell); (D) the ND in response to a given stimulus was calculated as the median

637 of the pairwise Euclidean distances between every state that occurred during the stimulus  
638 presentation. A schematic illustration is shown in **Figure 2**.

639 We normalized spectral differentiation values by the square root of the number of cells in the  
640 recorded population, reasoning as follows. Consider a hypothetical population of cells that each  
641 exhibit the same temporal pattern of activity. The spectral differentiation of such a population will  
642 be proportional to the square root of its size, because the Euclidean distance is used to  
643 compare neurophysiological states. If we have two such populations differing only in the number  
644 of cells, their activity should be considered to be equally differentiated for our purposes, since  
645 their temporal patterns are identical; any differences in spectral differentiation would be due to  
646 the (arbitrary) number of cells captured in the imaging session. Thus, we divided by the square  
647 root of the population size to remove this dependency.

## 648 **4.8.2 Multivariate differentiation**

649 We also measured ND using a multivariate approach that considers spatiotemporal differences  
650 in activity patterns. For each experimental session, we extracted  $\Delta F/F_0$  traces recorded during  
651 all stimulus presentations and concatenated them to obtain an  $m \times n$  matrix of responses where  
652  $m$  is the number of two-photon imaging samples and  $n$  is the number of traces. This matrix was  
653 then downsampled by summing the  $\Delta F/F_0$  traces within 100 ms bins. We used a nonlinear  
654 dimensionality reduction procedure, Uniform Manifold Approximation and Projection for  
655 Dimension Reduction (Python package `umap-learn`, McInnes et al., 2018), to reduce this matrix  
656 to  $m \times 10$  with parameters `UMAP(n_components=10, metric="euclidean", n_neighbors=100,`  
657 `min_dist=0.0)`. Each row of the resulting matrix was a 10-dimensional vector that represented  
658 the state of the cell population during the corresponding 100 ms interval. We then grouped the  
659 rows of the resulting matrix by stimulus. Each row vector can be thought of as a point in  $\mathbb{R}^{10}$ , so  
660 that each stimulus was associated with a cloud of points corresponding to the population states  
661 that the stimulus evoked over the course of all 10 trials.

662 The intuition motivating this approach is that we can operationalize the notion of  
663 neurophysiological differentiation by measuring the dispersion of this point cloud. The more  
664 distant two points are, the more different are the corresponding responses of the cell population;  
665 thus, if a stimulus evokes many different population states, the point cloud will be more spread  
666 out in response space. Therefore, we measured ND evoked by each stimulus by finding the  
667 centroid of its associated point cloud and taking the mean Euclidean distance of each point to  
668 the centroid.

## 669 **4.9 Statistics**

### 670 **4.9.1 Linear mixed effects models**

671 For aggregate statistics across all experimental sessions, we employed linear mixed effects  
672 models using the `lmer` function from the `lme4` package in R with `REML = FALSE` (Bates et al.,  
673 2015, p. 4). The distributions of ND values for both spectral and multivariate differentiation  
674 measures were well-approximated by log-normal distributions, so we applied a logarithmic  
675 transformation to ND values prior to statistical modeling.

676 First we fit an LME model with cortical layer, stimulus category (unscrambled or scrambled), and  
677 their interaction as fixed effects, with experimental session as a random effect (`lme4` formula:  
678 “`differentiation ~ 1 + layer * stimulus_category + (1 | session)`”). To test-layer  
679 specificity, we then fit a reduced model with the interaction removed

680 (“differentiation ~ 1 + area + stimulus\_category + (1 | session)”) and used a likelihood  
681 ratio test to compare the two models.

682 Next we fit an LME model with cortical area, stimulus category, and their interaction as fixed  
683 effects, with experimental session as a random effect (lme4 formula:  
684 “differentiation ~ 1 + area \* stimulus\_category + (1 | session)”). To test-area  
685 specificity, we fit a reduced model with the interaction removed  
686 (“differentiation ~ 1 + area + stimulus\_category + (1 | session)”) and used a likelihood  
687 ratio test to compare the two models.

688 We tested for differences among the unscrambled continuous stimuli (“snake (predator)”,  
689 “crickets (prey)”, “man writing”, “mousecam”, and “conspecifics”) by fitting an LME model with  
690 stimulus as a fixed effect and experimental session as a random effect (lme4 formula:  
691 “differentiation ~ 1 + stimulus + (1 | session)”).

#### 692 **4.9.2 Post hoc tests**

693 Post hoc one-sided z-tests of layer and area specificity were performed calling the `glht` function  
694 from the `multcomp` package in R on each LME model with contrasts between stimulus categories  
695 (unscrambled or scrambled) within each layer and area, respectively. P values were adjusted  
696 for multiple comparisons using the single-step method in `multcomp` (Hothorn et al., 2008).

697 Post hoc two-sided *t*-tests for pairwise differences among the unscrambled continuous stimuli  
698 were performed with the `emmeans` function from the `emmeans` package in R (“`emmeans(model,`  
699 `pairwise ~ stimulus`”), with p values adjusted for multiple comparisons using Tukey’s method  
700 (Lenth, 2020).

#### 701 **4.9.3 Permutation tests**

702 Permutation tests were performed for each experimental session to test whether spectral  
703 differentiation evoked by unscrambled stimuli was greater than that evoked by scrambled  
704 stimuli. We obtained a null distribution by randomly permuting the trial labels (unscrambled or  
705 scrambled) 20,000 times and computing the difference in mean spectral differentiation on  
706 unscrambled and scrambled trials for each permutation. P values were computed as the fraction  
707 of permutations for which the permuted difference was greater than the observed difference,  
708 and significance is reported at the level of  $\alpha = 0.05$ .

#### 709 **4.10 Decoding analysis**

710 For each experimental session, we decoded stimulus category (unscrambled or scrambled)  
711 using linear discriminant analysis with the Python package `scikit-learn` (Pedregosa et al.,  
712 2011). First, the responses to each category were concatenated to form a  $s \times (n \cdot t)$  matrix,  
713 where  $s$  is the number of stimulus presentation trials,  $n$  is the number of cells recorded, and  $t$  is  
714 the number of two-photon imaging samples in a single trial. To obtain a tractable number of  
715 features for linear discriminant analysis, we used PCA to reduce the dimensionality of the matrix  
716 such that the number of components  $c$  was sufficient to retain 99% of the variance along the  
717 rows, yielding an  $s \times c$  matrix (`sklearn.decomposition.PCA(n_components=0.99)`). This was then  
718 used to train a shrinkage-regularized LDA classifier with fivefold cross-validation  
719 (`sklearn.discriminant_analysis.LinearDiscriminantAnalysis(solver='lsqr',`  
720 `shrinkage='auto')`). We report the mean balanced accuracy score  
721 (`sklearn.metrics.balanced_accuracy_score`) on the heldout test data across cross-validation  
722 folds. Chance performance is 0.5.

723 For the analysis shown in Supplementary Figure 2, we used the same procedure as described  
724 above, but the classifier was trained to decode stimulus identity rather than category; chance  
725 performance is 1/12. For Supplementary Figure 3, we used the same procedure but trained the  
726 classifier using only responses to the 5 continuous naturalistic stimuli, and classifier  
727 performance was evaluated for each stimulus separately with the F1 score.

## 728 Acknowledgements

729 We thank Andrew Haun for helpful comments and assistance with creating the noise stimulus;  
730 Jonathan Lang for assistance filming the naturalistic stimuli; and Larissa Albantakis, Leonardo  
731 S. Barbosa, Tom Bugnon, Graham Findlay, Marcello Massimini, and Shuntaro Sasai for helpful  
732 discussions.

733 W.M. received support from the Natural Sciences and Engineering Research Council of Canada  
734 (RGPIN-2019-05418).

735 The data presented herein were obtained at the Allen Brain Observatory as part of the  
736 OpenScope project, which is operated by the Allen Institute. This work was supported by the  
737 Allen Institute, the Tiny Blue Dot Foundation, and in part by the Falconwood Foundation. We  
738 thank Allan Jones for providing the crucial environment that enabled our large-scale team effort.  
739 We thank the Allen Institute founder, Paul G. Allen, for his vision, encouragement, and support.

## 740 Competing interests

741 The authors declare no competing interests.



## 742 Author Contributions

|                             |                                                                                                                                                                                      |
|-----------------------------|--------------------------------------------------------------------------------------------------------------------------------------------------------------------------------------|
| <b>William G. P. Mayner</b> | Conceptualization, Data Curation, Formal Analysis, Investigation, Methodology, Software, Validation, Visualization, Writing – Original Draft Preparation, Writing – Review & Editing |
| <b>William Marshall</b>     | Conceptualization, Formal Analysis, Investigation, Methodology, Supervision, Validation, Writing – Review & Editing                                                                  |
| <b>Yazan N. Billeh</b>      | Data Curation, Investigation, Methodology                                                                                                                                            |
| <b>Saurabh R. Gandhi</b>    | Data Curation, Formal Analysis, Investigation, Validation, Visualization, Writing – Review & Editing                                                                                 |
| <b>Shiella Caldejon</b>     | Data Curation, Investigation, Project Administration                                                                                                                                 |
| <b>Andrew Cho</b>           | Investigation                                                                                                                                                                        |
| <b>Fiona Griffin</b>        | Data Curation, Investigation                                                                                                                                                         |
| <b>Nicole Hancock</b>       | Investigation                                                                                                                                                                        |
| <b>Sophie Lambert</b>       | Investigation                                                                                                                                                                        |
| <b>Eric Lee</b>             | Data Curation, Investigation, Software                                                                                                                                               |
| <b>Jennifer Luviano</b>     | Investigation, Project Administration                                                                                                                                                |
| <b>Kyla Mace</b>            | Investigation                                                                                                                                                                        |
| <b>Chelsea Nayan</b>        | Investigation                                                                                                                                                                        |
| <b>Thuyanh Nguyen</b>       | Data Curation, Investigation                                                                                                                                                         |
| <b>Kat North</b>            | Investigation                                                                                                                                                                        |
| <b>Sam Seid</b>             | Data Curation, Investigation                                                                                                                                                         |
| <b>Ali Williford</b>        | Investigation                                                                                                                                                                        |
| <b>Chiara Cirelli</b>       | Supervision, Writing – Review & Editing                                                                                                                                              |
| <b>Peter Groblewski</b>     | Project Administration, Supervision                                                                                                                                                  |
| <b>Jerome Lecoq</b>         | Data Curation, Funding Acquisition, Methodology, Project Administration, Resources, Software, Supervision, Writing – Review & Editing                                                |
| <b>Giulio Tononi</b>        | Conceptualization, Funding Acquisition, Resources, Supervision, Writing – Review & Editing                                                                                           |
| <b>Christof Koch</b>        | Conceptualization, Funding Acquisition, Resources, Supervision, Writing – Review & Editing                                                                                           |
| <b>Anton Arkhipov</b>       | Conceptualization, Funding Acquisition, Methodology, Project Administration, Resources, Supervision, Validation, Writing – Review & Editing                                          |

743 All authors reviewed and approved the final version of the manuscript.

## 744 References

- 745 Barth, A. L., & Poulet, J. F. A. (2012). Experimental evidence for sparse firing in the neocortex.  
746 *Trends in Neurosciences*, 35(6), 345–355. <https://doi.org/10.1016/j.tins.2012.03.008>
- 747 Barttfeld, P., Uhrig, L., Sitt, J. D., Sigman, M., Jarraya, B., & Dehaene, S. (2015). Signature of  
748 consciousness in the dynamics of resting-state brain activity. *Proceedings of the*  
749 *National Academy of Sciences*, 112(3), 887–892.  
750 <https://doi.org/10.1073/pnas.1418031112>
- 751 Bates, D., Mächler, M., Bolker, B., & Walker, S. (2015). Fitting Linear Mixed-Effects Models  
752 Using lme4. *Journal of Statistical Software*, 67(1), 1–48.  
753 <https://doi.org/10.18637/jss.v067.i01>
- 754 Bennett, C., Arroyo, S., & Hestrin, S. (2013). Subthreshold Mechanisms Underlying State-  
755 Dependent Modulation of Visual Responses. *Neuron*, 80(2), 350–357.  
756 <https://doi.org/10.1016/j.neuron.2013.08.007>
- 757 Boly, M., Sasai, S., Gosseries, O., Oizumi, M., Casali, A., Massimini, M., & Tononi, G. (2015).  
758 Stimulus Set Meaningfulness and Neurophysiological Differentiation: A Functional  
759 Magnetic Resonance Imaging Study. *PLOS ONE*, 10(5), e0125337.  
760 <https://doi.org/10.1371/journal.pone.0125337>
- 761 Brette, R. (2019). Is coding a relevant metaphor for the brain? *Behavioral and Brain Sciences*,  
762 42. <https://doi.org/10.1017/S0140525X19000049>
- 763 Buzsáki, G. (2019). *The brain from inside out*. Oxford University Press.
- 764 Casali, A. G., Gosseries, O., Rosanova, M., Boly, M., Sarasso, S., Casali, K. R., Casarotto, S.,  
765 Bruno, M.-A., Laureys, S., Tononi, G., & Massimini, M. (2013). A Theoretically Based  
766 Index of Consciousness Independent of Sensory Processing and Behavior. *Science*  
767 *Translational Medicine*, 5(198), 198ra105-198ra105.  
768 <https://doi.org/10.1126/scitranslmed.3006294>
- 769 Chen, T.-W., Wardill, T. J., Sun, Y., Pulver, S. R., Renninger, S. L., Baohan, A., Schreiter, E. R.,  
770 Kerr, R. A., Orger, M. B., Jayaraman, V., Looger, L. L., Svoboda, K., & Kim, D. S.  
771 (2013). Ultra-sensitive fluorescent proteins for imaging neuronal activity. *Nature*,  
772 499(7458), 295–300. <https://doi.org/10.1038/nature12354>
- 773 Dadarlat, M. C., & Stryker, M. P. (2017). Locomotion Enhances Neural Encoding of Visual  
774 Stimuli in Mouse V1. *The Journal of Neuroscience*.  
775 <https://doi.org/10.1523/JNEUROSCI.2728-16.2017>
- 776 de Vries, S. E. J., Lecoq, J. A., Buice, M. A., Groblewski, P. A., Ocker, G. K., Oliver, M., Feng,  
777 D., Cain, N., Ledochowitsch, P., Millman, D., Roll, K., Garrett, M., Keenan, T., Kuan, L.,  
778 Mihalas, S., Olsen, S., Thompson, C., Wakeman, W., Waters, J., ... Koch, C. (2020). A  
779 large-scale standardized physiological survey reveals functional organization of the  
780 mouse visual cortex. *Nature Neuroscience*, 23(1), 138–151.  
781 <https://doi.org/10.1038/s41593-019-0550-9>

- 782 Ganea, D. A., Bexter, A., Guenther, M., Garderes, P. M., Kampa, B. M., & Haiss, F. (2018).  
783 Pupillary dilations of mice performing a vibrotactile discrimination task reflect task  
784 engagement and response confidence. *BioRxiv*, 444919. <https://doi.org/10.1101/444919>
- 785 Glickfeld, L. L., & Olsen, S. R. (2017). Higher-Order Areas of the Mouse Visual Cortex. *Annual*  
786 *Review of Vision Science*, 3(1), 251–273. [https://doi.org/10.1146/annurev-vision-](https://doi.org/10.1146/annurev-vision-102016-061331)  
787 [102016-061331](https://doi.org/10.1146/annurev-vision-102016-061331)
- 788 Groblewski, P. A., Sullivan, D., Lecoq, J., Vries, S. de, Caldejon, S., L’Heureux, Q., Keenan, T.,  
789 Roll, K., Slaughterback, C., Williford, A., & Farrell, C. (2020). A standardized head-  
790 fixation system for performing large-scale, in-vivo physiological recordings in mice.  
791 *BioRxiv*, 2020.01.22.916007. <https://doi.org/10.1101/2020.01.22.916007>
- 792 Harris, C. R., Millman, K. J., Walt, S. J. van der, Gommers, R., Virtanen, P., Cournapeau, D.,  
793 Wieser, E., Taylor, J., Berg, S., Smith, N. J., Kern, R., Picus, M., Hoyer, S., Kerkwijk, M.  
794 H. van, Brett, M., Haldane, A., R’io, J. F. del, Wiebe, M., Peterson, P., ... Oliphant, T. E.  
795 (2020). Array programming with NumPy. *Nature*, 585(7825), 357–362.  
796 <https://doi.org/10.1038/s41586-020-2649-2>
- 797 Harris, J. A., Mihalas, S., Hirokawa, K. E., Whitesell, J. D., Choi, H., Bernard, A., Bohn, P.,  
798 Caldejon, S., Casal, L., Cho, A., Feiner, A., Feng, D., Gaudreault, N., Gerfen, C. R.,  
799 Graddis, N., Groblewski, P. A., Henry, A. M., Ho, A., Howard, R., ... Zeng, H. (2019).  
800 Hierarchical organization of cortical and thalamic connectivity. *Nature*, 575(7781), 195–  
801 202. <https://doi.org/10.1038/s41586-019-1716-z>
- 802 Hothorn, T., Bretz, F., & Westfall, P. (2008). Simultaneous Inference in General Parametric  
803 Models. *Biometrical Journal*, 50(3), 346–363. <https://doi.org/10.1002/bimj.200810425>
- 804 Huang, L., Knoblich, U., Ledochowitsch, P., Lecoq, J., Reid, R. C., Vries, S. E. J. de, Buice, M.  
805 A., Murphy, G. J., Waters, J., Koch, C., Zeng, H., & Li, L. (2020). Relationship between  
806 simultaneously recorded spiking activity and fluorescence signal in GCaMP6 transgenic  
807 mice. *BioRxiv*, 788802. <https://doi.org/10.1101/788802>
- 808 Hubel, D. H., & Wiesel, T. N. (1959). Receptive fields of single neurones in the cat’s striate  
809 cortex. *The Journal of Physiology*, 148(3), 574–591.  
810 <https://doi.org/10.1113/jphysiol.1959.sp006308>
- 811 Hudetz, A. G., Liu, X., & Pillay, S. (2014). Dynamic Repertoire of Intrinsic Brain States Is  
812 Reduced in Propofol-Induced Unconsciousness. *Brain Connectivity*, 5(1), 10–22.  
813 <https://doi.org/10.1089/brain.2014.0230>
- 814 Hunter, J. D. (2007). Matplotlib: A 2D Graphics Environment. *Computing in Science*  
815 *Engineering*, 9(3), 90–95. <https://doi.org/10.1109/MCSE.2007.55>
- 816 Jacobs, E. A. K., Steinmetz, N. A., Carandini, M., & Harris, K. D. (2018). Cortical state  
817 fluctuations during sensory decision making. *BioRxiv*, 348193.  
818 <https://doi.org/10.1101/348193>
- 819 Keller, A. J., Roth, M. M., & Scanziani, M. (2020). Feedback generates a second receptive field  
820 in neurons of the visual cortex. *Nature*, 582(7813), 545–549.  
821 <https://doi.org/10.1038/s41586-020-2319-4>

- 822 Koch, C., Massimini, M., Boly, M., & Tononi, G. (2016). Neural correlates of consciousness:  
823 Progress and problems. *Nature Reviews Neuroscience*, 17, 307.  
824 <http://dx.doi.org/10.1038/nrn.2016.22>
- 825 Larsen, R. S., & Waters, J. (2018). Neuromodulatory Correlates of Pupil Dilation. *Frontiers in*  
826 *Neural Circuits*, 12. <https://doi.org/10.3389/fncir.2018.00021>
- 827 Ledochowitsch, P., Huang, L., Knoblich, U., Oliver, M., Lecoq, J., Reid, C., Li, L., Zeng, H.,  
828 Koch, C., Waters, J., Vries, S. E. J. de, & Buice, M. A. (2019). On the correspondence of  
829 electrical and optical physiology in in vivo population-scale two-photon calcium imaging.  
830 *BioRxiv*, 800102. <https://doi.org/10.1101/800102>
- 831 Lenth, R. (2020). *emmeans: Estimated Marginal Means, aka Least-Squares Means, v1.5.1*.  
832 <https://CRAN.R-project.org/package=emmeans>
- 833 Madisen, L., Zwingman, T. A., Sunkin, S. M., Oh, S. W., Zariwala, H. A., Gu, H., Ng, L. L.,  
834 Palmiter, R. D., Hawrylycz, M. J., Jones, A. R., Lein, E. S., & Zeng, H. (2010). A robust  
835 and high-throughput Cre reporting and characterization system for the whole mouse  
836 brain. *Nature Neuroscience*, 13(1), 133–140. <https://doi.org/10.1038/nn.2467>
- 837 Marshall, W., Gomez-Ramirez, J., & Tononi, G. (2016). Integrated Information and State  
838 Differentiation. *Frontiers in Psychology*, 7. <https://doi.org/10.3389/fpsyg.2016.00926>
- 839 Marshel, J. H., Garrett, M. E., Nauhaus, I., & Callaway, E. M. (2011). Functional specialization  
840 of seven mouse visual cortical areas. *Neuron*.  
841 <https://doi.org/10.1016/j.neuron.2011.12.004>
- 842 Mashour, G. A., Roelfsema, P., Changeux, J.-P., & Dehaene, S. (2020). Conscious Processing  
843 and the Global Neuronal Workspace Hypothesis. *Neuron*, 105(5), 776–798.  
844 <https://doi.org/10.1016/j.neuron.2020.01.026>
- 845 McGinley, M. J., David, S. V., & McCormick, D. A. (2015). Cortical Membrane Potential  
846 Signature of Optimal States for Sensory Signal Detection. *Neuron*, 87(1), 179–192.  
847 <https://doi.org/10.1016/j.neuron.2015.05.038>
- 848 McGinley, M. J., Vinck, M., Reimer, J., Batista-Brito, R., Zaghera, E., Cadwell, C. R., Tolias, A. S.,  
849 Cardin, J. A., & McCormick, D. A. (2015). Waking State: Rapid Variations Modulate  
850 Neural and Behavioral Responses. *Neuron*, 87(6), 1143–1161.  
851 <https://doi.org/10.1016/j.neuron.2015.09.012>
- 852 McInnes, L., Healy, J., & Melville, J. (2018). UMAP: Uniform Manifold Approximation and  
853 Projection for Dimension Reduction. *ArXiv:1802.03426 [Cs, Stat]*.  
854 <http://arxiv.org/abs/1802.03426>
- 855 Mensen, A., Marshall, W., Sasai, S., & Tononi, G. (2018). Differentiation Analysis of Continuous  
856 Electroencephalographic Activity Triggered by Video Clip Contents. *Journal of Cognitive*  
857 *Neuroscience*, 30(8), 1108–1118. [https://doi.org/10.1162/jocn\\_a\\_01278](https://doi.org/10.1162/jocn_a_01278)
- 858 Mensen, A., Marshall, W., & Tononi, G. (2017). EEG Differentiation Analysis and Stimulus Set  
859 Meaningfulness. *Frontiers in Psychology*, 8, 1748.  
860 <https://doi.org/10.3389/fpsyg.2017.01748>

- 861 Niell, C. M., & Stryker, M. P. (2010). Modulation of Visual Responses by Behavioral State in  
862 Mouse Visual Cortex. *Neuron*. <https://doi.org/10.1016/j.neuron.2010.01.033>
- 863 Oizumi, M., Albantakis, L., & Tononi, G. (2014). From the phenomenology to the mechanisms of  
864 consciousness: Integrated information theory 3.0. *PLoS Computational Biology*, *10*(5),  
865 e1003588. <https://doi.org/10.1371/journal.pcbi.1003588>
- 866 Pafundo, D. E., Nicholas, M. A., Zhang, R., & Kuhlman, S. J. (2016). Top-Down-Mediated  
867 Facilitation in the Visual Cortex Is Gated by Subcortical Neuromodulation. *Journal of*  
868 *Neuroscience*, *36*(10), 2904–2914. <https://doi.org/10.1523/JNEUROSCI.2909-15.2016>
- 869 Pedregosa, F., Varoquaux, G., Gramfort, A., Michel, V., Thirion, B., Grisel, O., Blondel, M.,  
870 Prettenhofer, P., Weiss, R., Dubourg, V., Vanderplas, J., Passos, A., Cournapeau, D.,  
871 Brucher, M., Perrot, M., & Duchesnay, É. (2011). Scikit-learn: Machine Learning in  
872 Python. *Journal of Machine Learning Research*, *12*(85), 2825–2830.  
873 <http://jmlr.org/papers/v12/pedregosa11a.html>
- 874 Polack, P.-O., Friedman, J., & Golshani, P. (2013). Cellular mechanisms of brain state–  
875 dependent gain modulation in visual cortex. *Nature Neuroscience*, *16*(9), 1331–1339.  
876 <https://doi.org/10.1038/nn.3464>
- 877 Quiroga, R. Q., & Panzeri, S. (2009). Extracting information from neuronal populations:  
878 Information theory and decoding approaches. *Nature Reviews Neuroscience*, *10*(3),  
879 173–185. <https://doi.org/10.1038/nrn2578>
- 880 Reback, J., McKinney, W., jbrockmendel, Bossche, J. V. den, Augspurger, T., Cloud, P.,  
881 gyoung, Sinhrks, Hawkins, S., Klein, A., Roeschke, M., Tratner, J., Petersen, T., She,  
882 C., Ayd, W., MomIsBestFriend, Garcia, M., Schendel, J., Hayden, A., ... Winkel, M.  
883 (2020). *pandas-dev/pandas: Pandas 1.1.3 (v1.1.3)* [Computer software]. Zenodo.  
884 <https://doi.org/10.5281/zenodo.4067057>
- 885 Reimer, J., Froudarakis, E., Cadwell, C. R., Yatsenko, D., Denfield, G. H., & Tlilas, A. S.  
886 (2014). Pupil Fluctuations Track Fast Switching of Cortical States during Quiet  
887 Wakefulness. *Neuron*, *84*(2), 355–362. <https://doi.org/10.1016/j.neuron.2014.09.033>
- 888 Salkoff, D. B., Zaghera, E., McCarthy, E., & McCormick, D. A. (2020). Movement and  
889 Performance Explain Widespread Cortical Activity in a Visual Detection Task. *Cerebral*  
890 *Cortex*, *30*(1), 421–437. <https://doi.org/10.1093/cercor/bhz206>
- 891 Siegle, J. H., Jia, X., Durand, S., Gale, S., Bennett, C., Graddis, N., Heller, G., Ramirez, T. K.,  
892 Choi, H., Luviano, J. A., Groblewski, P. A., Ahmed, R., Arkhipov, A., Bernard, A., Billeh,  
893 Y. N., Brown, D., Buice, M. A., Cain, N., Caldejon, S., ... Koch, C. (2019). *A survey of*  
894 *spiking activity reveals a functional hierarchy of mouse corticothalamic visual areas*.  
895 <https://doi.org/10.1101/805010>
- 896 Siegle, J. H., Ledochowitsch, P., Jia, X., Millman, D., Ocker, G. K., Caldejon, S., Casal, L., Cho,  
897 A., Denman, D. J., Durand, S., Groblewski, P. A., Heller, G., Kato, I., Kivikas, S., Lecoq,  
898 J., Nayan, C., Ngo, K., Nicovich, P. R., North, K. R., ... Vries, S. E. J. de. (2020).  
899 Reconciling functional differences in populations of neurons recorded with two-photon  
900 imaging and electrophysiology. *BioRxiv*, 2020.08.10.244723.  
901 <https://doi.org/10.1101/2020.08.10.244723>

- 902 Tononi, G. (2004). An information integration theory of consciousness. *BMC Neuroscience*,  
903 5(1), 42. <https://doi.org/10.1186/1471-2202-5-42>
- 904 Tononi, G., Boly, M., Massimini, M., & Koch, C. (2016). Integrated information theory: From  
905 consciousness to its physical substrate. *Nature Reviews Neuroscience*, 17(7), 450–461.  
906 <https://doi.org/10.1038/nrn.2016.44>
- 907 Vinck, M., Batista-Brito, R., Knoblich, U., & Cardin, J. A. (2015). Arousal and Locomotion Make  
908 Distinct Contributions to Cortical Activity Patterns and Visual Encoding. *Neuron*, 86(3),  
909 740–754. <https://doi.org/10.1016/j.neuron.2015.03.028>
- 910 Virtanen, P., Gommers, R., Oliphant, T. E., Haberland, M., Reddy, T., Cournapeau, D.,  
911 Burovski, E., Peterson, P., Weckesser, W., Bright, J., van der Walt, S. J., Brett, M.,  
912 Wilson, J., Millman, K. J., Mayorov, N., Nelson, A. R. J., Jones, E., Kern, R., Larson,  
913 E., ... SciPy 1.0 Contributors. (2020). SciPy 1.0: Fundamental Algorithms for Scientific  
914 Computing in Python. *Nature Methods*, 17, 261–272. <https://doi.org/10.1038/s41592-019-0686-2>  
915
- 916 Wang, Q., Sporns, O., & Burkhalter, A. (2012). Network Analysis of Corticocortical Connections  
917 Reveals Ventral and Dorsal Processing Streams in Mouse Visual Cortex. *Journal of*  
918 *Neuroscience*, 32(13), 4386–4399. <https://doi.org/10.1523/JNEUROSCI.6063-11.2012>
- 919 Waskom, M., & the seaborn development team. (2020). *Mwaskom/seaborn* (latest) [Computer  
920 software]. Zenodo. <https://doi.org/10.5281/zenodo.592845>
- 921 Wei, Z., Lin, B.-J., Chen, T.-W., Daie, K., Svoboda, K., & Druckmann, S. (2020). A comparison  
922 of neuronal population dynamics measured with calcium imaging and electrophysiology.  
923 *PLOS Computational Biology*, 16(9), e1008198.  
924 <https://doi.org/10.1371/journal.pcbi.1008198>
- 925 Wenzel, M., Han, S., Smith, E. H., Hoel, E., Greger, B., House, P. A., & Yuste, R. (2019).  
926 Reduced Repertoire of Cortical Microstates and Neuronal Ensembles in Medically  
927 Induced Loss of Consciousness. *Cell Systems*, 8(5), 467–474.  
928 <https://doi.org/10.1016/j.cels.2019.03.007>
- 929

930 **Supplementary figures**

931

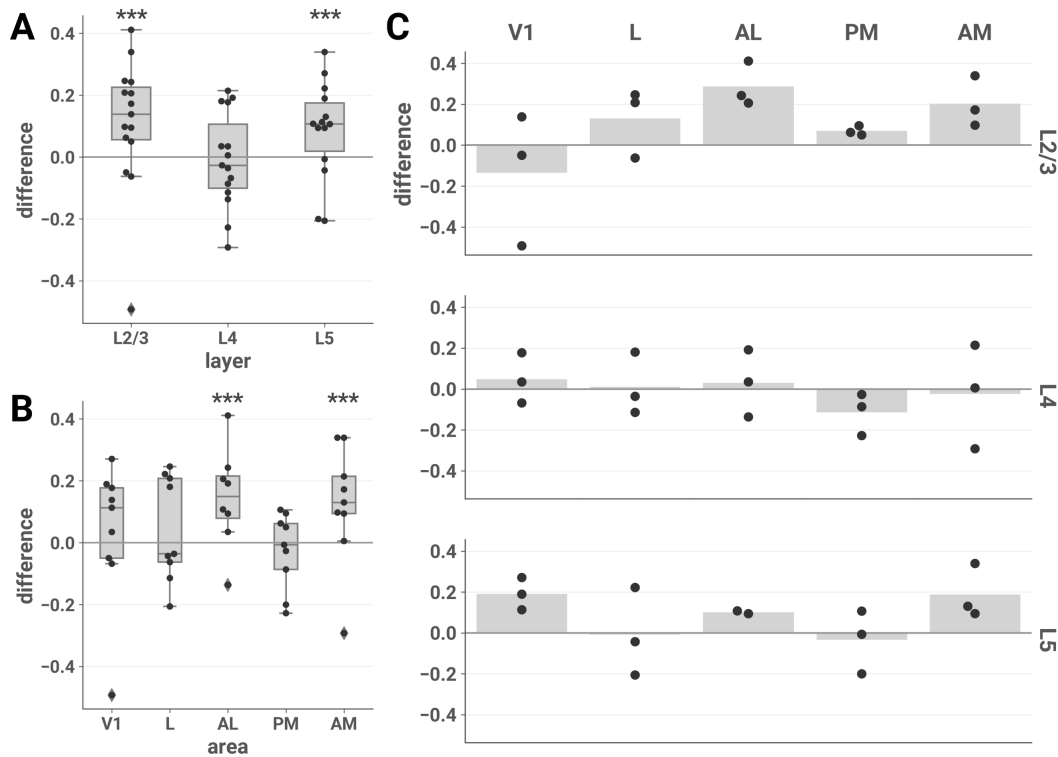

932

933 **Supplementary Figure 1. Naturalistic vs. artificial differences in ND across the entire stimulus**  
 934 **set.** The mean difference in ND of responses to all 8 naturalistic vs. all 4 artificial stimuli is plotted  
 935 for each session by layer (A), area (B), and layer-area pair (C). Results are similar to the  
 936 unscrambled vs. scrambled contrast shown in **Figure 2**. In this analysis, post hoc tests showed a  
 937 significant effect also in L5; however, this contrast does not control for low-level stimulus  
 938 characteristics and is thus harder to interpret. **(A)** We fit an LME model with stimulus category  
 939 (naturalistic or artificial), layer, and their interaction as fixed effects and found a significant  
 940 interaction (likelihood ratio test,  $\chi^2(2) = 16.343$ ,  $p = 0.000283$ ). Post hoc one-sided z-tests (adjusted  
 941 for multiple comparisons): L2/3,  $z = 4.974$ ,  $p = 9.82e-7$ ; L4,  $z = -0.450$ ,  $p = 0.965$ ; L5,  $z = 3.745$ ,  $p =$   
 942  $0.000271$ . **(B)** We fit an LME model with stimulus category (naturalistic or artificial), area, and  
 943 their interaction as fixed effects and found a significant interaction (likelihood ratio test,  $\chi^2(2) =$   
 944  $16.343$ ,  $p = 0.000283$ ). Post hoc one-sided z-tests (adjusted for multiple comparisons): V1,  $z =$   
 945  $1.207$ ,  $p = 0.725$ ; L,  $z = 1.523$ ,  $p = 0.495$ ; AL,  $z = 4.715$ ,  $p = 1.21e-5$ ; PM,  $z = -0.907$ ,  $p = 0.896$ ;  
 946 AM,  $z = 4.249$ ,  $p = 0.000107$ . **(A)** and **(B)**: asterisks indicate significant post hoc tests in the layer  
 947 (A) and area (B) interaction LME models (\*\*\*,  $p < 0.001$ ). Boxes indicate quartiles; whiskers  
 948 indicate the minimum and maximum of data lying within 1.5 times the inter-quartile range of the  
 949 25% or 75% quartiles; diamonds indicate observations outside this range. **(C)** Mean values are  
 950 indicated by bars.

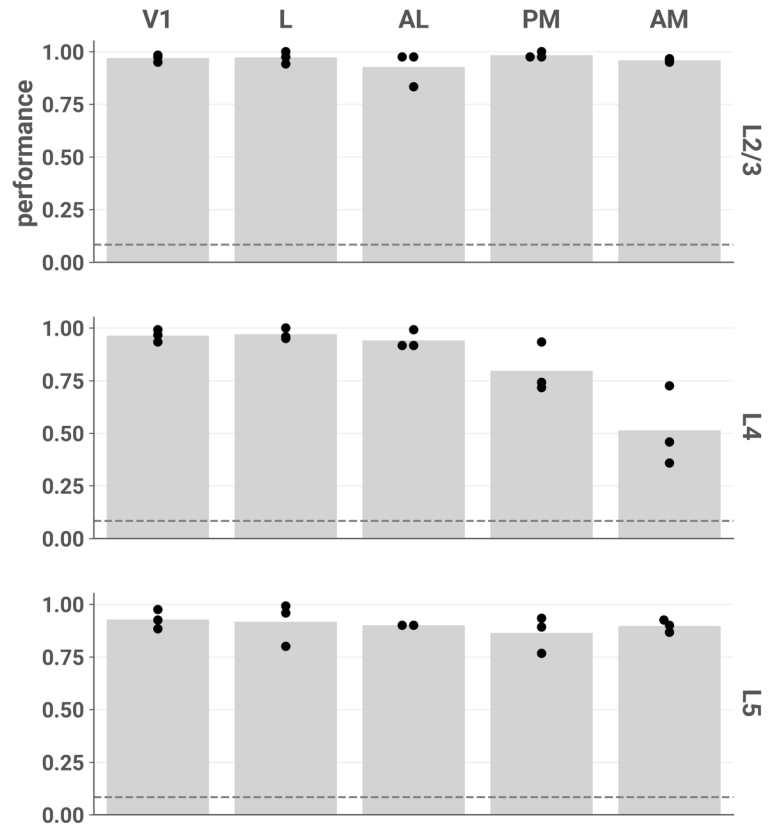

951

952

953

954

955

Supplementary Figure 2. **Stimulus identity can be accurately decoded from most layers and areas using responses to all 12 stimuli.** Each point represents the mean fivefold cross-validated balanced accuracy score of linear discriminant analysis performed on a single session (see **Decoding analysis**). Chance performance is 1/12, indicated by the dotted line.



## Differences in ND

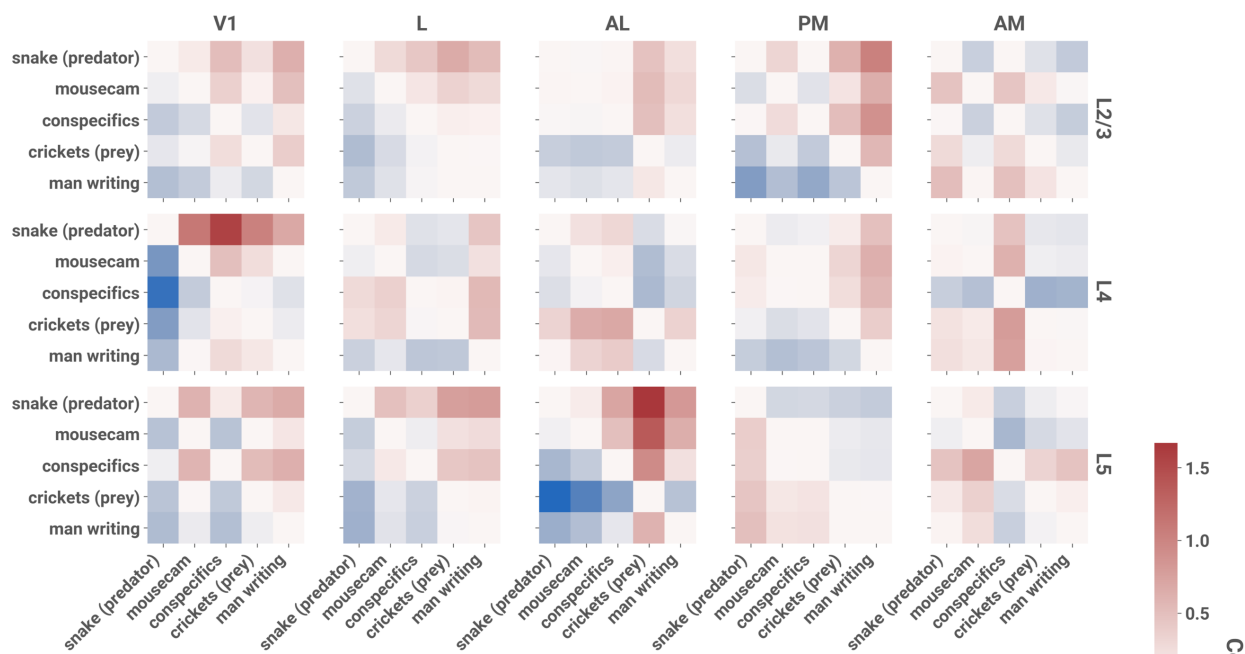

## Differences in decoding performance

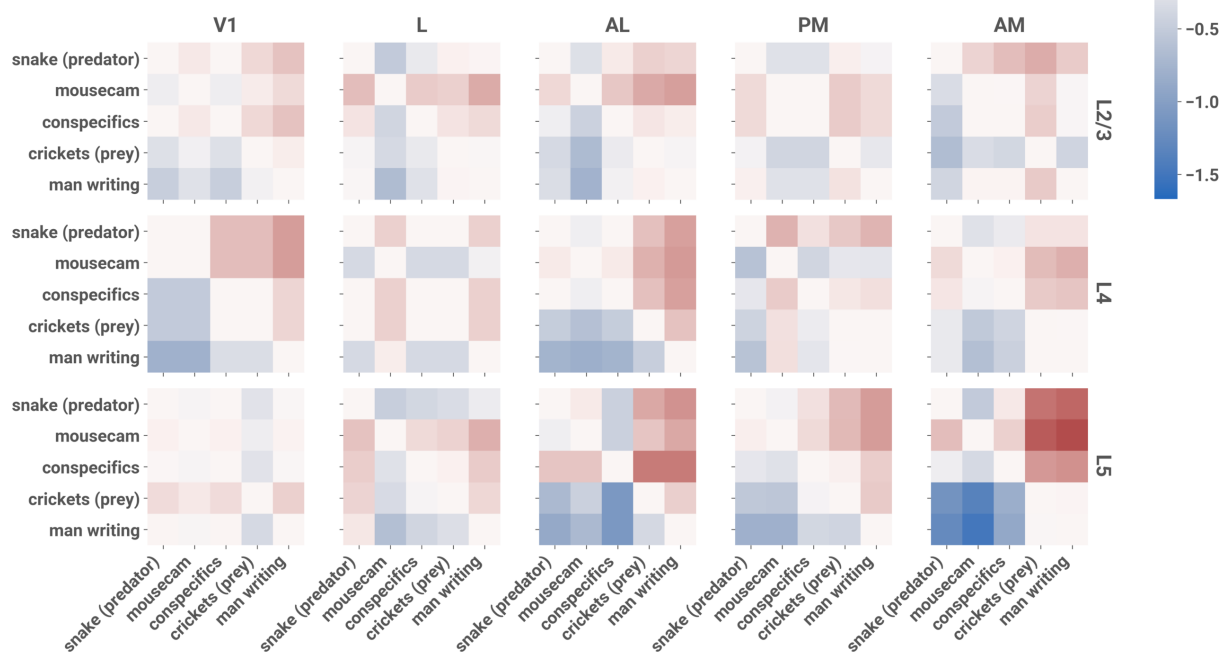

956

957 **Supplementary Figure 3. Within-category differences in ND vs. within-category differences in**  
 958 **decoding performance, by layer and area.** Top: Cohen's  $d$  for pairwise mean differences in ND  
 959 among naturalistic stimuli without jump cuts. Bottom: Cohen's  $d$  for pairwise mean differences in  
 960 stimulus identity decoding performance. For each session, we trained a linear discriminant analysis  
 961 classifier using only responses to these 5 stimuli; classification performance was evaluated as the  
 962 mean fivefold cross-validated F1 score for each stimulus (see **Decoding analysis**).
